# Supplementary material for: KIAA1109 Variants Are Associated with a Severe Disorder of Brain Development and Arthrogryposis
Source: PubMed Central journal article supplement (PMC5777449; doi:10.1016/j.ajhg.2017.12.002), 2017-12-28
Supplement: mmc1.pdf [file mmc1.pdf]

## Supplemental Data

### ***KIAA1109* Variants Are Associated with a Severe Disorder of Brain Development and Arthrogryposis**

Lucie Gueneau, Richard J. Fish, Hanan E. Shamseldin, Norine Voisin, Frédéric Tran Mau-Them, Egle Preiksaitiene, Glen R. Monroe, Angeline Lai, Audrey Putoux, Fabienne Allias, Qamariya Ambusaidi, Laima Ambrozaityte, Loreta Cimbalistienė, Julien Delafontaine, Nicolas Guex, Mais Hashem, Wesam Kurdi, Saumya Shekhar Jamuar, Lim J. Ying, Carine Bonnard, Tommaso Pippucci, Sylvain Pradervand, Bernd Roechert, Peter M. van Hasselt, Michaël Wiederkehr, Caroline F. Wright, DDD Study, Ioannis Xenarios, Gijs van Haaften, Charles Shaw-Smith, Erica M. Schindewolf, Marguerite Neerman-Arbez, Damien Sanlaville, Gaëtan Lesca, Laurent Guibaud, Bruno Reversade, Jamel Chelly, Vaidutis Kučinskas, Fowzan S. Alkuraya, and Alexandre Reymond

## **Supplemental note: case reports**

## Detailed description of affected individuals

### LT Family:

The elder brother of the Lithuanian family LT.II.1 was born at 40 weeks of gestation. His birth weight was 4100 g (75 centile), his height was 55 cm (90 centile), and the Apgar score was 9 at 1 minute and 10 at 5 minute. Movements of the eyes in up direction were noted from 3 months of age. EEG was normal. At age of 13 months paroxysmal loss of consciousness with drooling, eyes rolling up, repetitive blinking, and muscle spasms had started. They lasted 3-10 minutes and occurred once a week or two. The proband was treated with valproic acid, nitrazepamum, diazepamum. Later lamotrigin and topiromate were added. The last paroxysm was at age of 3.5 years. Brain MRI at age of 8 years revealed small posterior fossa arachnoid cyst, discrete vermian atrophy and slight increase of the fluid-filled retro and infra-cerebellar space as well as mild enlargement of subarachnoid spaces of frontal regions. The boy has hypermetropia (+5.5), strabismus and astigmatism. Global psychomotor retardation and hypotonia were noted from two months of age. The proband could sit independently and walk for a few steps with support until age of 10 years. Later in life, his motor abilities declined and he could not stand without support. Spontaneous paroxysms of laughter manifested from 2 years of age. He shows stereotypic movements as arm flapping or waving, and rhythmic body rocking. Additional clinical features are delayed eruption of permanent teeth, enuresis and encopresis. At 13 years and 8 months his head circumference was 53 cm (10 centile), his weight 35 kg (3-10 centile) and height 154 cm (10-25 centile). He presented with muscular hypotonia, plagiocephaly, strabismus, fat deposit in pubis, mild contractures of large joints, hypermobile small joints, talipes valgus, partial cutaneous syndactyly of 2<sup>nd</sup> and 3<sup>rd</sup> toes and a hypoplastic scrotum. He has no speech and severe ID (IQ<35). Array-CGH with Agilent 44K revealed no potentially pathogenic genomic structural abnormalities.

The younger sister LT.II.2 was born from an uncomplicated pregnancy at 38 weeks of gestation. Her birth weight was 4200 g (90 centile), Apgar 9, 9. She had clubfoot and her hands and feet were in paretic position. Her affected brother showed a similar posture after birth. Myoclonic movements of arms have been noted few days after birth. Hypotonia, movements of the eyes in up direction, nystagmus and strabismus manifested during the first month. At age of 2 months brain CT and EEG

showed no abnormalities. Paroxysmal loss of consciousness with drooling, eyes rolling up, repetitive blinking, and muscle spasms manifested at age of 10 months. Brain MRI at age of 1 year 8 months showed enlargement of subarachnoid spaces facing discrete parenchymal rarefaction involving the frontal lobes. Hypermetropia (+6), strabismus and astigmatism were diagnosed by an ophthalmologist. Psychomotor retardation was noted from birth. She could roll over at age of 5 years, could never sit without support or stand. She has problems with developing the ability to chew food and has chronic constipation. She showed stereotypic movements as arm flapping or waving. She has excessive drooling and frequently grinds her teeth. At 7 years and 5 months her head circumference was 49 cm (3-10 centile), her weight 25 cm (50 centile) and her height 134 cm (90 centile). She presented with muscular hypotonia, plagiocephaly, strabismus, mild contractures of large joints, talipes valgus and psoriasis. She has no speech and severe ID (IQ<35). Array-CGH with Agilent 105K revealed no potentially pathogenic genomic structural abnormalities.

### **AL Family:**

The AL family pregnancy was the first one of healthy consanguineous parents. It was marked by the discovery at 21 WA (weeks of amenorrhea) of multiple cerebral malformation including triventricular hydrocephalus and thalamic fusion and bilateral equinovarus foot by ultrasound, which resulted in decision to terminate the pregnancy. Measurements were in the normal range according to a 22 WA fetus, i.e. occipital frontal circumference (OFC) = 21cm (+2SD), weight= 478g, talus-vertex length = 27cm, except for the brain weight (44g <10th percentile). A thorough examination of the AL.II.1 fetus revealed an arthrogryposis of the upper and lower limbs with crisped hands, adductus thumbs and bilateral equinovarus feet. The facial dysmorphism encompassed hypertelorism, a big horizontal mouth with retrognathism and miss-oriented ears. A scrotal hypoplasia and choane atresia was found. A slightly diffuse sero-hemorrhagic effusion was noticed. Neuropathological examination demonstrated, on the supra-tentorial space, both absence of cortical lamination and diffuse migration anomalies within a thin parenchymal mantle, as well as ventriculomegaly and voluminous germinal matrix. Corpus callosum was not identified. On infra-tentorial space, pathological findings include hypoplasia of the pons with absence of the longitudinal and transversal fibers and dysplasia of the



cerebellum characterized by lack of foliation and poorly identified vermis as well as narrowing of the aqueduct. Note that gyration analysis could not be performed due to poor conservation. Other tissues analysis revealed a dilatation of lymph vessels in the fibrous septa of the lung suggestive of a pulmonary lymphangiectasia and bilateral cataract with crystalline fibers of variable size and orientation. Skeletal X-rays examinations were normal. Standard blood chromosomes and a 60K quator PréCytoNEMv2 array-CGH (Agilent Technologies, CA, USA) were normal.

### **TU1 family:**

The proband TU1.II.1 was the first child of first cousins parents from Tunisia. While her mother is healthy, her father is unable to read and write. He is epileptic with cognitive impairment secondary to encephalitis occurring at the age of five years. His MRI performed at 27 years was normal. During pregnancy, hypoplastic left heart, arthrogryposis with club feet and cerebral abnormalities were found. Prenatal imaging (ultrasound and MRI) showed on the infra-tentorial space cerebellar hypoplasia and brainstem dysgenesis characterized by flat and elongated pons and slightly kinked brainstem with increased fluid-filled retro-cerebellar spaces. Supra-tentorial anomalies include severe parenchymal (or cerebral mantle) thinning with major lack of gyration (lissencephalic aspect) associated with voluminous germinal matrix protruding within moderate ventriculomegaly and absence of corpus callosum. Cephalic biometry was normal. She was born at 34 GW. She presented facial dysmorphism with hypotelorism, deep palate, long fingers and left club foot. Cardiac ultrasound confirmed left hypoplastic heart with mitral and aortic atresia. Cerebral ultrasound confirmed antenatal ascertainments. Karyotype and FISH 22q11.2 were normal. She died at 3 days of life. Pathological examination was not performed according to parental decision.

This first pregnancy was followed by two spontaneous miscarriages (TU1.II.2 and TU1.II.3). During the fourth pregnancy of this couple, the mother was referred due to recurrence of a polymalformative fetus (TU1.II.4) characterized on ultrasound examination at 22 weeks by severe parenchymal thinning with lack of gyration associated with ventriculomegaly and corpus callosum agenesis. Extra-cerebral findings included arthrogryposis but a normal cardiac anatomy. The pregnancy was terminated at 23 GW. Pathological examination showed clenched hands with bilateral

camptodactyly, bilateral clubfeet, shoulder and hip joints contractures. No visceral malformation was observed. Brain examination showed a complete agenesis of the corpus callosum, ventricular dilatation, severe cortical malformations with a reduced cortical plate and vermian agenesis. Hyperplastic germinal matrix was protruding within ventricles. Neuropathological examination showed dysplasia of brainstem and cerebellum with neuroglial ectopia. At the supra-tentorial level, no callosal fibers were identified. The cortical plate showed neuronal depletion, numerous foci of heterotopia were observed within white matter. The three next pregnancies of the couple resulted in three healthy children.

### **TU2 family:**

TU2.II.2 was the second child of consanguineous parents from Tunisia with no known genealogical links with the TU1 family. Prenatal imaging (ultrasound and MRI) showed on the infra-tentorial space both cerebellar hypoplasia and dysgenesis associated to severe brainstem dysgenesis characterized by flat and elongated pons and slightly kinked brainstem with increased fluid-filled retro-cerebellar spaces. Corpus callosum could not be identified. Supra-tentorial anomalies include severe parenchymal thinning with major lack of gyration demonstrating a pseudo-lissencephalic aspect as well as voluminous germinal matrix protruding within severe ventriculomegaly. Moreover, microphthalmia and club feet were present. She was born at 37 GW with a birth weight of 3100g, birth length of 45 cm and head circumference of 33 cm. She presented with microphthalmia, blepharophimosis, narrow chest, club feet and hands. She was hypotonic, with a reduced mobility and feeding and sucking difficulties. Post-natal MR confirmed prenatal data showing both thin cortical ribbon and global parenchymal thinning with lissencephalic aspect as well as bands of gray matter situated between the lateral ventricle and cerebral cortex, suggestive of neuronal migration disorder. This examination demonstrated also multiple germinolytic cysts within bilateral voluminous residual germinal matrix protruding in a severe dilated ventricular system. On infra-tentorial space, cerebellar and brainstem dysgenesis were confirmed associated with increased fluid-filled retro-cerebellar spaces and showed also a large arachnoid cyst responsible for mass effect on the distal part of the cerebellar tentorium. She died at 12 days of life, secondary to hypoventilation in a context of pulmonary hypoplasia. Autopsy was not performed according to parental decision. High-throughput sequencing of a panel of

29 genes involved in cortical malformation failed to pinpoint possibly causative variants.

### **UK family:**

The British proband UK.II.1 (DDD #263241) is a 11 year old girl. She presented global developmental delay, behavioral problems (poor concentration, immaturity and minor self-harm when angry or frustrated) with mild to moderate learning disability allowing her to be in mainstream school but 2 years behind her peers. Prenatal imaging, including MRI, showed major microcephaly (HC -5 SD) with reduced white matter volume and mild ventriculomegaly but no abnormality of the cerebral hemispheres and no midline abnormalities. There was hypertelorism, slightly upslanting palpable fissures and oculo-motor apraxia, hypermetropia and strabismus. Dental crowding and high palate were also noticed. Skeletal abnormalities were also observed in this proband such as asymmetry of the thorax, mild bilateral talipes managed by physiotherapy, syndactyly of the 2<sup>nd</sup> and 3<sup>rd</sup> toes, 5<sup>th</sup> toe clinodactyly and hallux valgus. Finally, she had a complex congenital heart disorder with tetralogy of Fallot and pulmonary atresia, along with gastroesophageal reflux.

### **SA1 family:**

The detailed phenotype of this individual was described in reference 13. Briefly, the SA1.II.1 fetus had severe ventriculomegaly with supra-tentorial cerebral mantle thinning associated with cerebellar hypoplasia, pleural effusion, severe arthrogryposis (fixed elbows, fixed bilateral talipes, bilateral overlapping fingers, bilateral clinodactyly, and bilateral club foot), low set ears, small eyes and micrognathia. The baby died after around one hour of delivery in the NICU. Parents are first cousins and they have had a previously affected child who is now deceased.

### **SA2 family:**

First cousin Saudi parents presented to King Faisal Specialist Hospital & Research Center (KFSHRC) Maternal-Fetal Medicine for further evaluation when a screening ultrasound at a local hospital revealed multiple fetal anomalies of SA2.II.1. Ultrasonographic assessment at 18 weeks revealed hydrocephalus with hypoplastic cerebellum, absent corpus callosum, and shortened upper and lower limb bones. Multiple flexion deformities were noted. Heart could not be visualized but the chest,

abdomen and face appeared normal. No fetal movements were detected. Delivery was induced and resulted in a stillbirth with severe hydrocephalus and arthrogryposis multiplex. Babygram revealed poorly ossified calvarium and mildly shortened long bones. Parents did not authorize clinical photographs or autopsy.

### **SA3 family:**

First cousin Saudi parents presented to KFSHRC Maternal-Fetal Medicine because of two previous intrauterine fetal deaths diagnosed with severe hydrocephalus and multiple skeletal anomalies (no records available). Ultrasonographic assessment of SA3.II.1 at 30 weeks revealed intrauterine fetal death with absent heart activity. Hydrocephalus, hypoplastic cerebellum, multiple flexion deformities and skin edema were noticed. Labor was induced and a dead fetus was delivered with severe hydrocephalus and arthrogryposis. The family declined clinical photographs or autopsy.

### **US Family:**

The US family pregnancy was the third of healthy non-consanguineous parents. The couple's first pregnancy (US.II.1) resulted in a spontaneous miscarriage of unknown etiology at 11 weeks, cytogenetic testing revealed a normal 46, XY karyotype. The couple's second pregnancy (US.II.2) resulted in a spontaneous miscarriage at 20 weeks, secondary to findings of cystic hygroma, hydrocephaly, clinodactyly and talipes. Cytogenetic testing revealed 46, XY karyotype. No other testing was performed. The US.II.3 affected fetus was evaluated at 18 weeks 5 days gestation for concern for multiple congenital anomalies including cystic hygroma, ventriculomegaly, echogenic bowel, low conus and closed spinal defect with splayed vertebral arches at L4-L5, small liver only omphalocele, non-immune hydrops with scalp edema, bilateral pleural effusions, possible anal atresia, talipes, hyperflexed wrists, bilateral clinodactyly, low-set ears, short penis with bulbous shaft identified by ultrasound. High resolution fetal MRI detected ventriculomegaly, narrowing of the frontal lateral ventricles, thin cortical mantle, abnormal hypo-intense basal ganglia, absent corpus callosum and 3<sup>rd</sup> ventricle, kinked brainstem, hypoplasia of the cerebral hemispheres, and arthrogryposis. Fetal echocardiogram revealed a coarctation of the aorta. Additionally, during the evaluation the fetus was exhibiting

abnormal umbilical artery dopplers showing decreased end diastolic flow. The family elected for pregnancy termination and autopsy. A thorough neurological and genetic autopsy was completed. Physical examination detected severe arthrogryposis with flexion contractures and pterygia formation in all joints of the extremities as well as muscle atrophy, webbed neck, partially malrotated bowel and small placenta. Evaluation of the brain was significant for hydrocephaly, diaphanous pallium, small cerebellum and brainstem, heterotopic grey tissue, thickened basal meninges, all concerning for a migration defect and brainstem hypoplasia. Prenatal genetic testing included a normal 46, XY male karyotype via chorionic villus sampling.

### **SG Family:**

The Singaporean siblings were two sons born to healthy, unrelated parents. The elder SG.II.1 brother was born at 34 weeks of gestation, the product of the couple's first pregnancy. Prenatally, severe ventriculomegaly was detected on ultrasound scan and fetal magnetic resonance imaging (MRI). Prenatal genetic testing included a normal male karyotype (46,XY) via amniocentesis. At birth, his weight was 2425 g (50-90<sup>th</sup> centile), his length was 43 cm (10-50<sup>th</sup> centile) and his head circumference was 38 cm (4 cm > 97<sup>th</sup> centile). He had minimal respiratory effort at birth and required immediate intubation and mechanical ventilation. On examination, macrocephaly, hypertelorism, posteriorly rotated ears, flattened nasal bridge, and excess skin fold of the neck were observed. He had generalized arthrogryposis, involving bilateral shoulders, elbows, wrists, hands and knees. He also had bilateral structural congenital talipes equinovarus (CTEV). Eye examination showed bilateral congenital cataracts and microphthalmia. He also had hypotonia, an ano-rectal malformation with recto-perianal fistula, and a small atrial septal defect/patent foramen ovale. Cerebral MR demonstrated severe ventriculomegaly with decreased pericerebral spaces, severe parenchymal thinning and smooth cortical surface, germinolysis cysts involving voluminous germinal matrix protruding within lateral ventricles as well as non identification of corpus callosum. Infra-tentorial findings include severe cerebellar hypoplasia with severe brain-stem dysgenesis characterized by a kinking aspect. Array-CGH with Agilent 44K revealed no potentially pathogenic genomic structural abnormalities. A ventriculo-peritoneal shunt was inserted at 2 months of age. He did not have adequate spontaneous respiration and was ventilator-dependent from birth, apart from two days when a trial of

extubation was done. He passed away at 3 months of age, from pneumonia and septic shock.

The next two pregnancies of the parents resulted in miscarriages (SG.II.2 and SG.II.3). Their fourth pregnancy resulted in the birth of the SG.II.4 younger brother, also at 34 weeks of gestation. Antenatally, bilateral ventriculomegaly, and club feet and hands were observed on ultrasound scan. At birth, his weight was 2130 g (10-50<sup>th</sup> centile), his length was 41 cm (10<sup>th</sup> centile) and his head circumference was 38.5 cm (4.5cm > 97<sup>th</sup> centile). His clinical findings were remarkably similar to his elder brother, with similar facial features (hypertelorism, bilateral low-set ears, short nose, anteverted nares), webbed neck, generalized arthrogryposis (involving bilateral elbows, wrists, hips and knees), bilateral structural congenital talipes equinovarus (CTEV), bilateral congenital cataracts and microphthalmia, and hypotonia. However, the younger brother did not have an ano-rectal malformation, and his cardiac defect was a fenestrated atrial septal defect. Magnetic resonance imaging (MRI) of the brain showed imaging findings similar to those that were described on the index case. He also remained ventilator-dependent from birth. The parents decided on withdrawal of invasive ventilation, and the baby passed away at 1 month of age.

# Figure S1

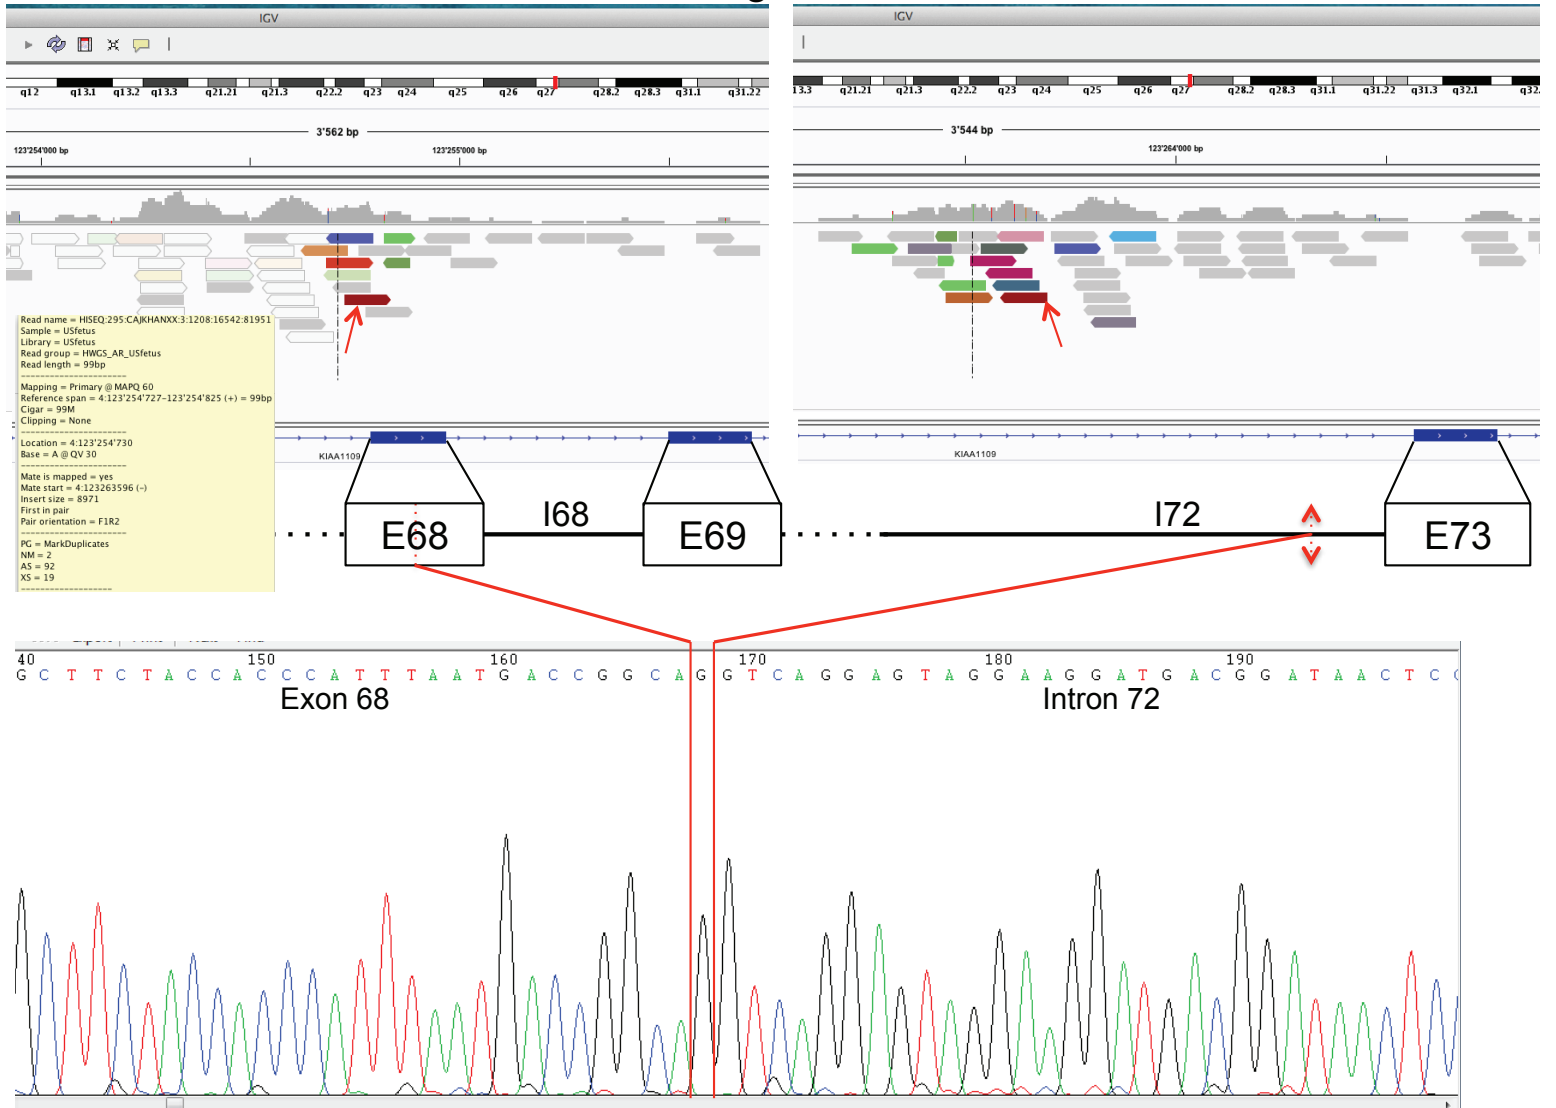

### **Figure S1: Breakpoint mapping of the US family large deletion**

From top to bottom: whole genome paired-end sequences of the US.II.3 fetus are visualized on the Integrative Genomics Viewer (IGV). Reads aligning to *KIAA1109* intron 67, exon 68 (E68), intron 68 (I68), exon 69 (E69) (left panel), intron 72 (I72) and exon 73 (E73) (right panel) are schematically shown. A single pair of reads (chestnut brown pointed-head rectangles pinpointed by red arrows) mapping unequivocally 8971 bp apart was identified (see yellow inset) allowing to narrow down the mapping of the breakpoints of the paternally-inherited deletion of the US.II.3 proband. They were then finely mapped using PCR and Sanger sequencing to coordinates chr4:123,254,885 (hg19) within E68 and chr4:123,263,438 within I72 respectively with the insertion of a guanine nucleotide. The breakpoints are depicted by a dotted line in E68, a double pointed arrow in I72 and two vertical red lines on each side of the inserted G nucleotide in the Sanger chromatogram, respectively.



## Figure S2

### Exon1

chr13:12,668,517-12,668,866

agtgtgcatttgcagtttacttgataagtgagaggctgatgcagaccctgtgtaatttgatagtgatgtccgctctgt  
ttatctgcagtggggtgtaaccATGGATAAAGGCAACAACAGTCTCCCCACTTACGATGAAATAGATGAATACCTCAG  
CAGGCGCAACTCCACCTTCGTGTGGCTCCTTGTGGgtaagtgatttatgatttgtgcttcgtctacactttgcaatca  
gcacagttacagtctacactggaggtgcctagtagattgcattgagttttaaagggtacagttcacccaaaaatgaacc  
tttactgaacttacataaacctgtatgtgtcctcctt

### Exon 4

chr13:12,671,867-12,672,216

acacacacacacaaacacacgcaataaaccttttgagactctgcttattgctggttctgtgagacctttttcatt  
tgatatgggttatatttcatctttatctctgttgtttatatttgtcattttcagAATTCAGGATGGGTTACTCAT  
ATTTTCGTTGGTGGAAAGATGTACAACCCAAAGCAGAAGCAACATgtcagtgcaaaaacagaacaaacagcaagaatt  
gttcaatttgagcacatcatgtcagtcctcaatagtctcagtcctcagtacaccaatcccacaatatctgtaaattgcttg  
tcattttagttgctctatggttgggtttatctgtgctt

### Exon 7

chr13:12,683,417-12,683,816

aattgaatgtcttatttctatgagtgctctatcctcaagtattgtgaccaagaaaaacctaataaatattgactgac  
attactctttctggttttgccttcagGTCGCGTAGCATTGGTAATCACCATCTTCCTCAGACCCTCTGCATGAACT  
TTGACGATGCCTTCTTGACATATGCCACCAAACCACCCAGCAGCCATCTGGATCAGTTCATGCACATTGTGAAGGGTT  
CATTGGAGAAGTTCGTGTCATGCTGGTGCCAGTCCACGATACCTAGGCCTTCAGAATGACCGtgtagtcaaataat  
ctccagtatatcagattagattgattctactttattgtcattgggcaggaatagagccatttaaagggatattcacc  
aaaaattac

**Figure S2: Zebrafish *kiaa1109* editing target sites**

CRISPR Cas9 target sites in exons 1, 4 and 7 of zebrafish *kiaa1109* are shown. Exon numbering and chromosome 13 coordinates according to NM\_001145584.1 and zebrafish genome assembly GRCz10/danRer10, respectively. Exon sequences are in blue and upper case, nucleotides at exon edges are in light blue. sgRNA target sites are underlined with PAM sequences boxed. The expected position for Cas9 DNA cleavage and mutations introduced by non-homologous end joining is between the two red nucleotides. The position for annealing of genotyping oligonucleotides is highlighted yellow; with the reverse oligonucleotide having the reverse complement of the second highlighted sequence (one DNA strand is represented).

## Figure S3

### A. Exon 1

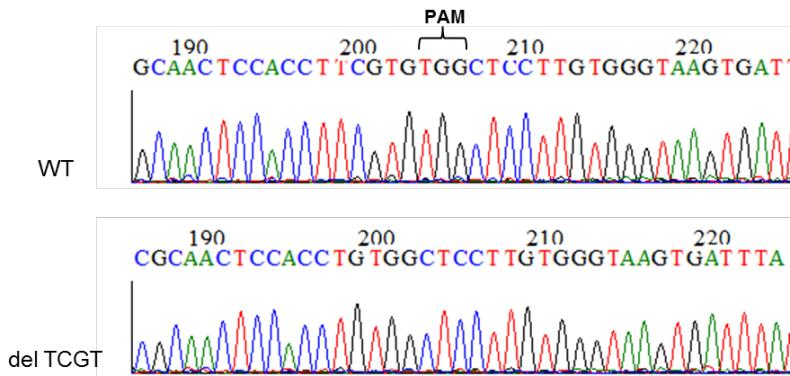

Reference sequence from exons 1 and 2.

Exon border nucleotides in blue, PAM in red

```
atggataaaggcaacaacagtctccccacttacgatgaaatagatgaatacctcagcagg  
M D K G N N S L P T Y D E I D E Y L S R  
cgcaactccaccttcggtggctccttgtggcactattatgtcatgcggatggatcata  
R N S T F V W L L V A T I M S C G W I I  
tatctgacatactacaattctcgcaatattggcctcgtcctcaccctcatcattaaccga  
Y L T Y Y N S R N I G L V L T L I I N R  
ctctacaagaatggatacacacatcg  
L Y K N G Y I H I
```

Mutation in exon 1 (deletion of TCGT), NM\_001145584.1:c.74\_77del

```
atggataaaggcaacaacagtctccccacttacgatgaaatagatgaatacctcagcagg  
M D K G N N S L P T Y D E I D E Y L S R  
cgcaactccacctgtggctccttgtggcactattatgtcatgcggatggatcatatatac  
R N S T C G S L W P L L C H A D G S Y I  
tgacatactacaattctcgcaatattggcctcgtcctcaccctcatcattaaccgactct  
- H T T I L A I L A S S S P S S L T D S  
acaagaatggatacacacatcg  
T R M D T Y T S
```

## B. Exon 4

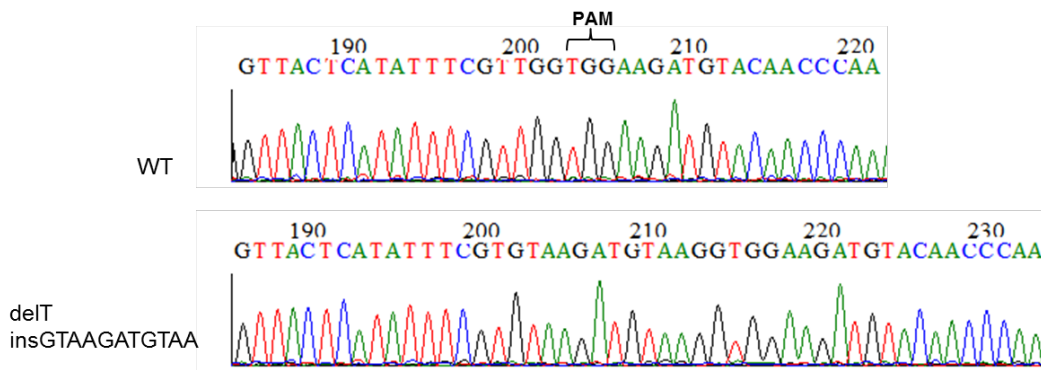

Reference sequence from exons 4 and 5.

Exon border nucleotides in blue, PAM in red

```

aattcaggatggggttactcatatcttcggttggtggaagatgtacaacccaaagcagaagcaa
  I Q D G L L I F R W W K M Y N P K Q K Q
catgacccgaaggctgagacgcgtctctatgttactgttaacggctttgagttccatggt
  H D P K A E T R L Y V T V N G F E F H V
tataatcggacggatctgtacactcggcttcaggaaatatttggcctcgagcccaccctt
  Y N R T D L Y T R L Q E I F G L E P T L
atccaatccaaccgggatgaggagaaaggccgagaacagagggataaatccttggagag
  I Q S N R D E E K G R E Q R D K S L E
  
```

Mutation in exon 4 (indel, delT insGTAAGATGTAA),

NM\_001145584.1:c.316delTinsGTAAGATGTAA

```

aattcaggatggggttactcatatcttcggtgtaagatgtaagggtggaagatgtacaacccaa
  I Q D G L L I F R V R C K V E D V Q P K
gcagaagcaacatgacccgaaggctgagacgcgtctctatgttactgttaacggctttga
  A E A T - P E G - D A S L C Y C - R L -
gttccatgtttataatcggacggatctgtacactcggcttcaggaaatatttggcctcga
  V P C L - S D G S V H S A S G N I W P R
gccacccttatccaatccaaccgggatgaggagaaaggccgagaacagagggataaatc
  A H P Y P I Q P G - G E R P R T E G - I
cttggagag
  L G E
  
```

### C. Exon 7

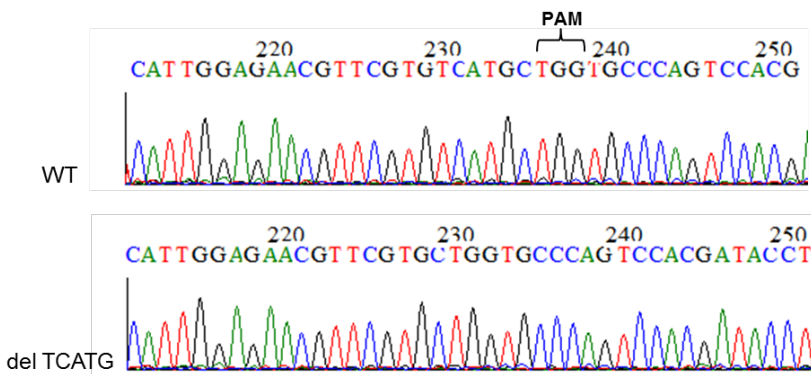

Reference sequence from exons 7 and 8.

Exon border nucleotides in blue, PAM in red

ggtcgcgtagcatttggtaatcaccatcttcctcagaccctctgcatgaactttgacgat  
 G R V A F G N H H L P Q T L C M N F D D  
 gccttcttgacatatgccaccaaaccacccagcagccatctggatcagttcatgcacatt  
 A F L T Y A T K P P S S H L D Q F M H I  
 gtgaagggttcattggagaacgttcgtgctgctggtgcccagtcacgataccttaggc  
 V K G S L E N V R V M L V P S P R Y L G  
 ctcagaatgacgaaacctccgaggctcatgggtgagggatttgggtcatgcagtcgaat  
 L Q N D E P P R L M G E G F V V M Q S N  
 gatgtggacatttactactatcaagatgaaccag  
 D V D I Y Y Y Q D E P

Mutation in exon 7 (del TCATG), NM\_001145584.1:c.758\_762del

ggtcgcgtagcatttggtaatcaccatcttcctcagaccctctgcatgaactttgacgat  
 G R V A F G N H H L P Q T L C M N F D D  
 gccttcttgacatatgccaccaaaccacccagcagccatctggatcagttcatgcacatt  
 A F L T Y A T K P P S S H L D Q F M H I  
 gtgaagggttcattggagaacgttcgtgctggtgcccagtcacgataccttaggccttca  
 V K G S L E N V R A G A Q S T I P R P S  
 gaatgacgaaacctccgaggctcatgggtgagggatttgggtcatgcagtcgaatgatgt  
 E - R T S E A H G - G I C G H A V E - C  
 ggacatttactactatcaagatgaaccag  
 G H L L L S R - T

### Figure S3: Zebrafish *kiaa1109* variants

We generated three different stable zebrafish lines with frameshift variants, i.e. c.74\_77del, c.316delTinsGTAAGATGTAA and c.758\_762del in exons 1 **(A)**, 4 **(B)** and 7 **(C)** of *kiaa1109* (a.k.a. si:ch211-233a24.2, exon numbering and variant nomenclature according to NM\_001145584.1). Representative sequencing chromatograms are shown for unedited (WT allele, top) and edited (mutant allele, bottom) sequences. The traces are from clones from genotyping PCRs, using tail clips of heterozygous adult fish. The predicted frameshift resulting from these mutations is given as a block of cDNA, with its single letter translated amino acid sequence under the DNA, in the regions of the editing target sites. Predicted stop codons are shown as hyphens.

**Figure S4**

**A**

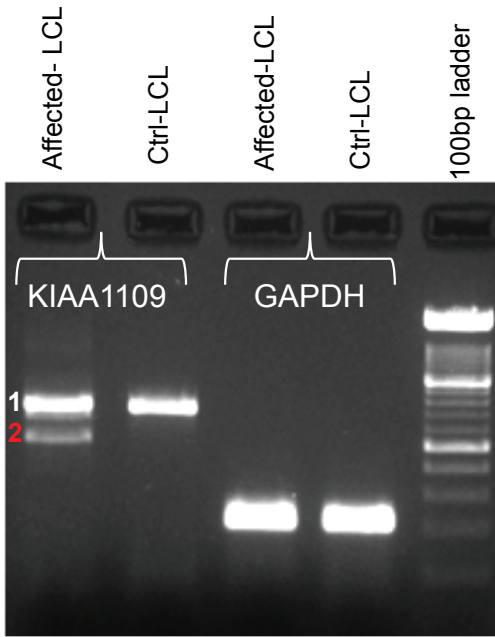

**B**

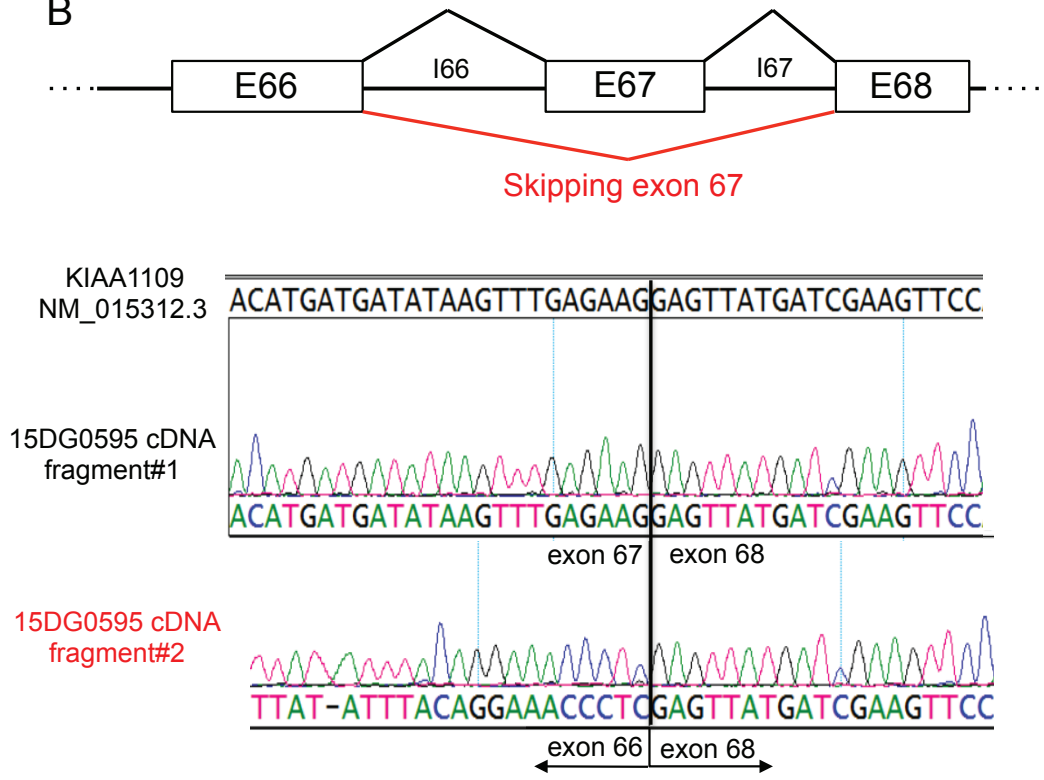

**Figure S4: The *KIAA1109* c.11250-1G>A variant induces skipping of exon 67 in the SA2.II.1 fetus.**

**(A)** Agarose gel separation of RT-PCR amplicons of *KIAA1109* exons 66 to 68 from lymphoblastoid cell lines (LCL) from the affected SA2.II.1 fetus (affected-LCL) and a control individual (Ctrl-LCL) (left). We observe two bands corresponding to an amplicon with all exons (fragment #1) and an amplicon missing exon 67 (2) specifically in the LCLs of the affected fetus. *GAPDH* was used as positive control (right). **(B)** Sanger sequencing of fragment 1 (top) and 2 (bottom) amplicons from the affected-LCL compared with that of the Ctrl-LCL amplicon. Sanger sequencing of fragment 2 showed the skipping of exon 67.



Figure S5

R968C

Human -----FHVVCREYELERPKSVIICQHGIDRRFCESKLSKIPGPCPTSDDLKYTMIRL 995  
Pig -----FHVVCREYELERPKSVIICQHGIDRRFCESKLSKIPGPCPTSDDLKYTMTRL 994  
Mouse -----FHVVCREYELERPKSVIICQHGIDRRFCESKLSKIPGPCPTSDDLKYTMTRL 995  
Opossum -----FHVVCREYELERPKSVIICQHGIDRRFCESKLSKIPGPCPTSDDLKYTMTRL 1000  
Chicken -----FHVVCREYELERPKSVIICQHGIDRRFCESKLSKIPGPCPTSDDLKYTMTRL 994  
Coelacanth STVLFCHLLFSSCREFIEKSI-----KQICCLLPCEP--EVRYTFCYL 866  
Zebrafish -----FHVMSREFOLEQPKPSVTCQHGVDRRICDAKHAGLPGHCRTSEDLKYTMTRL 977  
                  :. .\*\* : \* \* :::\*\* :

Y1329C

Human TQDKSVGQSPLRSPLKRQASVCSTRLGSTKSLTAAFYGDKQPVTVGVQFSSDVSRSDENV 1352  
Pig TQDKSVGQSPLRSPLKRQASVCSTRLGSTKSLTAAFYGDKQPVTVGVQFSSDVSRSDENV 1351  
Mouse TQDKSVGQSPLRSPLKRQASVCSTRLGSTKSLTAAFYGDKQPVTVGVQFSSDVSRSDENV 1352  
Opossum TQDKSVGQSPLRSPLKRQASVCSTRLGSTKSLTAAFYGDKQPVTVGVQFSSDVSRSDENV 1357  
Chicken SQERPVGQSPMRSPLKRQASVCSTRLGSTKSLTAAFYGDKQPVTVGVQFSSDVSRSDENV 1350  
Coelacanth SQDKPSVHSPKSPKSRQASVCSTRLGSTKSLTAAFYGEKQPAPAGVQFSSDVSRSDENV 1218  
Zebrafish IPEGPPLRSPLRSPLKRQASVCSTRLGSTKSLTAAFYVEKALPPAGVQFSSDVSRSDENV 1307  
                  : :\*\*::\*\*\*\*\*:\* \* :\*\*\*\*\*:\*. : \* .\*\*\*\*\*:\*\*\*\*\*

M1573I

Human SLHRPLDLDTPTSEESSSSFEQLSVPTFKVIKQGLTANSLDRGMQLSGSTSNTPYTPLE 1588  
Pig SLHRPLDLDTPTSEESSSSFEQLSVPTFKVIKQGLTANSLDRGMQLSGSTSNTPYTPLE 1587  
Mouse SLHRPLDLDTPTSEESSSSFEQLCVPTFKVIKQGLTANSLDRGMQLSGSTSNTPYTPLD 1588  
Opossum SLHRPLDLDTPTSEESSSSFEHLSVPTFKVIKQGLTANSLDRGMQLTGSTSNTPYTPLE 1593  
Chicken SLHRPLDLDTPTSEESSSSFEHLSVPTFKVIKQGLTANSLDRGMQLTGSTSNTPYTPLD 1588  
Coelacanth SLHRPLDLDTPTSEESSSSFDQLSVPTFKVVKQGLTANSLDRGMQLMGSTSTAPYTPLE 1456  
Zebrafish SLHRPLDLDTPTSEESSTCFDQLSIPTFKVMKAGLSASSLLDRGMQLMGDINSTPYTPLD 1534  
\*\*\*\*\*:\*. : \* .\*\*\*\*\*:\*\*\*\*\*:\*\*\* \* ..:\*\*\*\*\*:

V1867M

Human VHQLRGLDT-TDIGTCAITAIPEFKSKVLFLEELDEFVDETDQO-----AVPD 1877  
Pig VHQLRGLDT-TDIGTCAITAIPEFKSKVLFLEELDEFVDETDQO-----AVPD 1875  
Mouse VHQLRGLDT-TDIGTCAITAIPEFKSKVLFLEELDEFVDETDQO-----AIPD 1877  
Opossum VHQLRGLDT-TDNGTCAITAIPEFKSKVLFLEELDEFVDETDHQ-----AIPD 1881  
Chicken VHQLRGLDT-TDIGTCAITAIPEFKSKVLFLEELDEFVDETDQO-----AVPD 1878  
Coelacanth IHGQLRGLDAAEDIGTCAITAIPEFKSKVLFLEELDEFVDETEQO-----NPSD 1745  
Zebrafish IHSQLRGLDS-SDIGACAITAIPEFKSKVLFLEELDEFVDETEPSISTEHMPEHNPD 1824  
\*:\*\*\*\*\*: \* \* :\*\*\*\*\*:\*\*\*:\* \* :\*\*\*\*\*: . \*\*\*\*\* \*

R1958Q

Human DSPTGSGYNTDVSDNLPDRITSPSSDLNGNSVSDEQDEGVESDDLKLDLPLMPPPPDSC 1997  
Pig DSPTGSGYNTDVSDNLPDRITSPSSDLNGNSVSDEQDEGVESDDLKLDLPLMPPPPDSC 1995  
Mouse DSPTGSGYNTDVSDNLPDRITSPSSDLNGNSVSDEQDEGVESDDLKLDLPLMPPPPDSC 1997  
Opossum DSPTGSGYNTDVSDNLPDRITSPSSDLNGNSVSDEQDEGVESDDLKLDLPLMPPPPDSC 2001  
Chicken DSPTGSGYNTDVSDNLPDRITSPSSDLNGNSVSDEQDEGVESDDLKLDLPLMPPPPDSC 1998  
Coelacanth GSPTGSGYNTDVSDNLPDGVSPSSDLNGNSVSDEQDEGVESDDLKLDLPLMPPPPDSS 1865  
Zebrafish GSQTGSGYSTDVSDNLPDQAQSPASEPNNNSDSDEQDEGVESDDLKLDLPLMPPPPDSS 1944  
.\* \*\*\*\*\*:\*\*\*\*\*:\*\*\*\* \* \*\*:\* \* \*\* \*\*\*\*\*:\*\*\*\*\*:\*\*\*\*\*:\*\*\*\*\*.

P3050H

Human KAEYKMRMRSHGMTGAQTRFTFELPNHRLRFTSKVSATDMSTIPPSASLNLPVPTMSGK 3057  
Pig KAEYKMRMRSHGMTGAQTRFTFELPNHRLRFTSKVSATDMSTIPPSASLNLPVPTMSGK 3055  
Mouse KAEYKMRMRSHGMTGAQTRFTFELPNHRLRFTSKVSATDMSTIPPSASLNLPVPTMSGK 3057  
Opossum KAEYKMRMRSHGMTGAQTRFTFELPNHRLRFTSKVSATDMSTIPPSASLNLPVPTMSGK 3062  
Chicken KAEYKMRMRSHGMTGAQTRFTFELPNHRLRFTSKVSATDMSTIPPSASLNLPVPTMSGK 3056  
Coelacanth KAEYKMRMRSHGMTGAQTRFTFELPNHRLRFTSKVSPVDMSTIPPSASLNLPVPTMSGK 2928  
Zebrafish KAEYKMRMRSHGMTGAQTRFTFELPNHRLRFTSKVSPVDMSTIPPSASLNLPVPTMSGK 2991  
\*\*\*\*\*:\*\*\*\*\*:\*\*\*\*\*:\*\*\* \* \* \* \* .\*:::\*\*:\* \*\*\*\*\*:

G3385R

Human GDLDTGSAVLVTIESTLITACSSSELVSKGHFKNFCIRFADGFETSWDDWKPEIRGDLVM 3415  
Pig GDLDTGSAVLVTIESTLITACSSSELVSKGHFKNFCIRFADGFETSWDDWKPEIRGDLVM 3413  
Mouse GDLDTGSAVLVTIESTLITACSSSELVSKGHFKNFCIRFADGFETSWDDWKPEIRGDLVM 3415  
Opossum GDLDTGSAVLVTIESTLITACSSSELVSKGHFKNFCIRFADGFETSWDDWKPEIRGDLVM 3420  
Chicken ADLDTGSAVLVTIESTLITACSSSELVSKGHFKNFCIRFADGFETSWDDWKPEIRGDLVM 3414  
Coelacanth VDFDAGSALVLTIESTLITACSSSELVSKGHFKNFCIRFADGFETSWDDWKPEVRTDLVM 3288  
Zebrafish IDFDTGSAVLVTIESTLITACSSSELVSKGHFKNFCIRFAEGFETSWDDWKPEIRGDLVM 3344  
\*:\*\*\*\*\*:\*\*\*\*\*:\*\*\*\*\*:\*\*\* \* \* \* \* .\*:::\*\*:\* \*\*\*\*\*:

**Figure S5: The missense variants identified in the probands affect conserved *KIAA1109* residues.**

Multialignments of the regions of KIAA1109 harboring the missense variants identified in the Singaporean (R968C), the Lithuanian (Y1329C and V1867M), the British (M1573I and R1958Q), the Algerian (P3050H) and the Tunisian (G3385R) affected individuals. The position of the putatively changed residue is boxed. The identified codon modifications are indicated above.

Figure S6

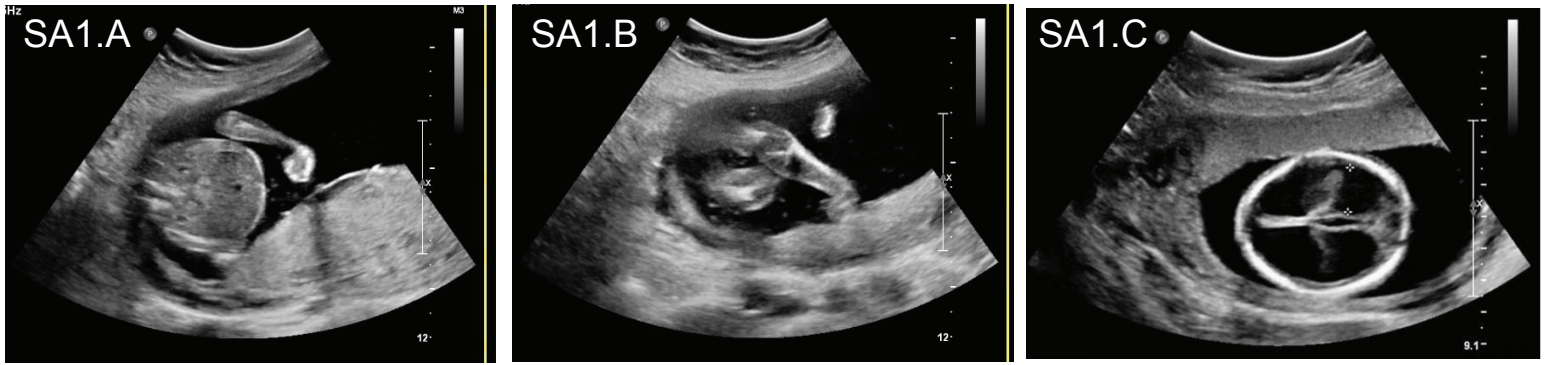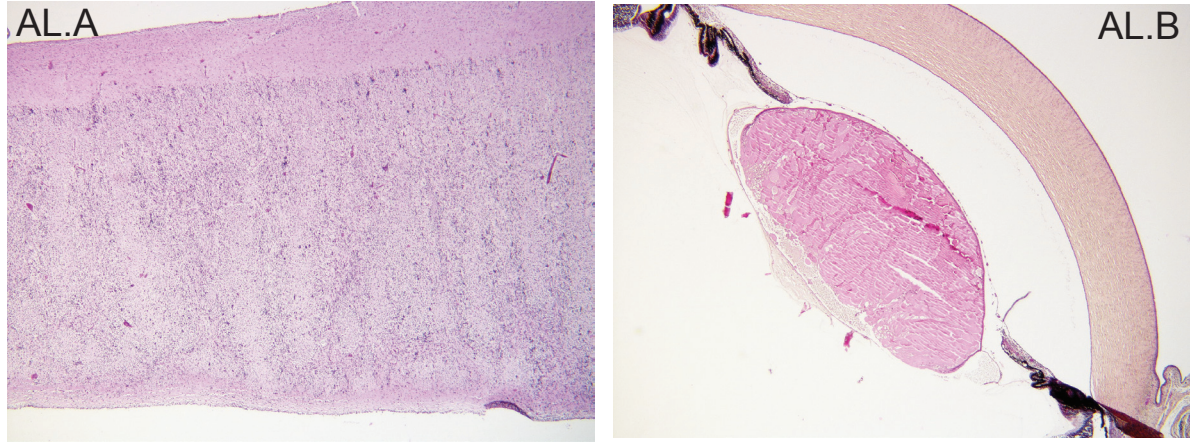

**Figure S6. Ultrasound images of the SA1.II.1 and US.II.3 stillborn fetuses and histology pictures of AL.II.1.**

**SA1(A-C)** Antenatal ultrasound scans from the SA1.II.1 fetus showing a fixed flexed hand (**A**), a club feet (**B**) and cerebellar hypoplasia (**C**).

**AL(A-B)** Histology pictures from the AL.II.1 fetus showing lamination defect (**A**) and cataract (**B**).

**Figure S7**

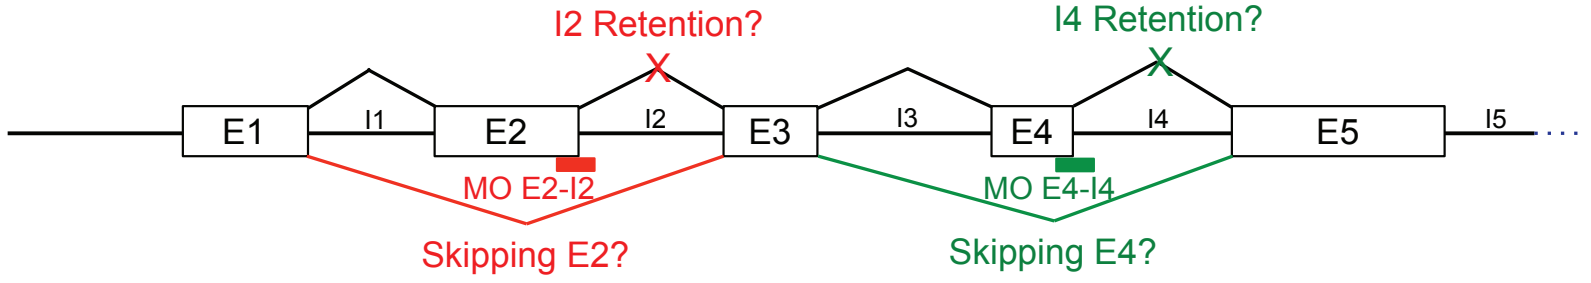

**PCR k11a1109 E1F-E4R**

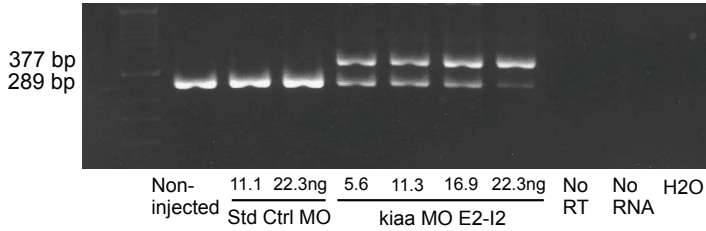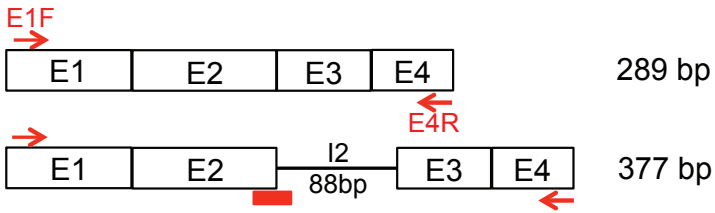

**I2 retention: 50 new aa + STOP in E3**

**PCR k11a1109 E2F-E5R**

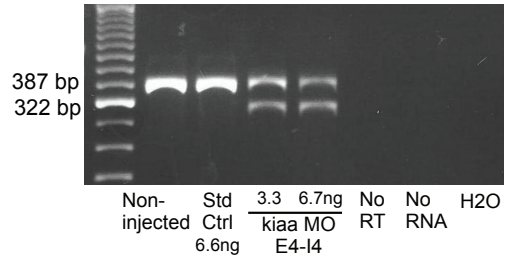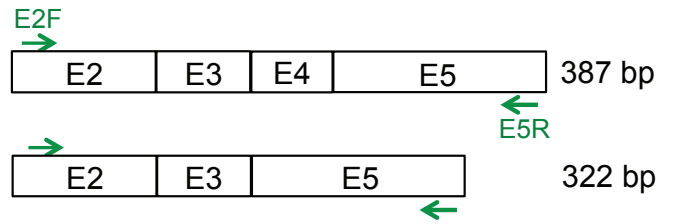

**E4 skipping: E3-E5 out of frame > STOP in E5**

**Figure S7: *kiaa1109* morpholino (MO) knockdown strategy in zebrafish.**

The top panel shows the schematic representation of the exon-intron structure of the 5' portion of the zebrafish *kiaa1109*. The sites targeted by the two MOs (morpholinos) are indicated in red (sbMO E2-I2) and green (sbMO-E4-I4) and can result in either exon skipping or intron retention.

The consequences of injection of sbMO E2-I2 (left) and sbMO-E4-I4 (right) on the *kiaa1109* transcript are assessed by RT-PCR. The outcomes are schematically depicted at the bottom, i.e. retention of intron 2 (left) and skipping of exon 4 (right). The positions of the used primers (red and green arrows) and the sizes of the amplicons are indicated. The sequences of the used primers are as follow: E1F-5'-GAATACCTCAGCAGGCGCAA-3'; E4R-5'-GGTTGTACATCTTCCACCAACG-3'. E2F-5'- ATCTGACATACTACAATTCTCGCAA-3' and E5R-5'-TATCCCTCTGTTCTCGGCCT-3'. Different doses of both MO were tested. They resulted in the same abnormal transcripts with increased efficiency with increased doses. The agarose gel pictures presented in the middle panels show from left to right RT-PCR performed in uninjected, standard control-MO injected and *kiaa1109*-MO injected embryos, respectively. The sbMO E2-I2 resulted in intron 2 retention whereas the sbMO E4-I4 resulted in exon 4 skipping. The 377bp band corresponds to the amplicon from the transcript keeping intron 2, whereas the 322bp band corresponds to the amplicon from the transcript skipping exon 4. Both MOs result in early stop codon and are predicted to encode truncated *kiaa1109* proteins.

# Supplementary Figure S8

## A

|                |                                                                |     |
|----------------|----------------------------------------------------------------|-----|
| H.sapiens      | -----MDQRKNESIVPSITQLEDF-----LTEHNSNVVWLLVATI-LSCGWIIYLT       | 45  |
| D.melanogaster | MEALEVEDTSDDSLPMGFPEVGTWNSTHNVSLNDMNL DARMIWLLASLL-TTITWVTYIT  | 59  |
| C.elegans      | -----MSDFDIQIKIDDAQLDLKGVSFVWTASVVTLFLAWSTFVV                  | 40  |
|                | : : : .. .* : : : * :..                                        |     |
| H.sapiens      | YYNSRVNGLILTLVLNRLY---K-HGYIHIGSFVSV-LSGKVMVREIYYITEDMSIRIQ    | 100 |
| D.melanogaster | FYNSRVIGMLITKIANRWF---IKGAYFKIGSVALNP-LAGKIMFRDFVYITYDYTVRAQ   | 115 |
| C.elegans      | LFFSRVSALFFTFVIDKYLRLSKNGIHFKIGGISISGLHAGKIMFRNVIYDNGDMTIKVN   | 100 |
|                | : ** :...* : : : : : ** :... * . * : : :                       |     |
| H.sapiens      | DGFIIFRWWMYNPQKQHD-PAETRLYITVNDFEFHVYVNRSDLYGRLEFGLEPTII       | 159 |
| D.melanogaster | DGYFIFRWWSYVPKDVSEDLSDTRLSVQLNGYELHIYNRS DLYDTLEKTFGLEPSLL     | 175 |
| C.elegans      | DGHLLFKYWKSV EHRHLNLS-TKRASRLHLVNLGLHVNIYNNLT KYTEIARIRRFDWFFE | 159 |
|                | ** :...* : : . . : : ** : : * . :...** . * : . : : :           |     |
| H.sapiens      | PPKDDDKTRE-----IGRTRTQSKIERVVKTESQDPTSSWRS---LIPVIKVVN         | 207 |
| D.melanogaster | IPTDAASNEERNKLKEHHMNLNARQSRIQ---NVKNSEAMQATTWRD---LIPVIKIDV    | 230 |
| C.elegans      | N-----TNMNDARRPQ-----TKPPDTPSPSSVWENMWNLGIVHIEV                | 197 |
|                | : : * . . . : : *.. * : : : : *                                |     |
| H.sapiens      | STGRLAFGNHYPQTLCINFDDAFLTYTTKPPSSHLDQFMHIVKGKLENVRVMLVPSPRY    | 267 |
| D.melanogaster | CSGRFVFGNRLTPTTSLISVEEAHCTYSTKPAVCRLDHFMHFVKAKVENAKVLF CSPKY   | 290 |
| C.elegans      | SAGCILVGNKFLPYALWTRFENLNSKTSV--TESANDRALLTFEGETENVAVSLIKNEQF   | 255 |
|                | .* : .* : * : * : : . : . * : : . : : * . * : . : :            |     |
| H.sapiens      | VG-LQNDPEPRLMGE-GFVVMQSNVDVIYYMDEPGLVPEETEENIEGEMSS EDCKLQDL   | 325 |
| D.melanogaster | TG-LI-DEPPRYMGE-GFVVMMSNQMDLYFYMDEPGVVPEHPVQIVL----PNGDVVEPS   | 343 |
| C.elegans      | DFTAKDKDPRTMGNDGCPLLSASLEFVYKQDLLGYVTDDEPQS-----ITLK           | 304 |
|                | .* ** : * : : * : : : * * * : . : :                            |     |
| H.sapiens      | PPCWGLDIVCGKGTDFNYGPWADRQRDCLWKFFFFPPDYQVLKVSEIAQGRPRQILAFEL   | 385 |
| D.melanogaster | PPVWGINARCLRGTDYSYGPWADRQRDHLRYFYPSDWKEAEVTPTPQPGELRSYQSF DV   | 403 |
| C.elegans      | LPLWSSEWRFGNNTVLSYGPWAEQQRF LIYSFFYPDFQNSTATAMPTRGKKRIHV KHDV  | 364 |
|                | * * . : . * : . * * * : * * : : : . * . * : : :                |     |
| H.sapiens      | RMNIIADATIDLLFTKNRETNAVHVNVGAGSYLEINIPMTVEENGYTPAIKGQLLHVDAT   | 445 |
| D.melanogaster | TLCVLNEATIDILFSKEKETNAMHITVGPASYVEMTIPWVTQPDGYTSKIQQQLFHVEAT   | 463 |
| C.elegans      | KIILTKETCMDIWFMRGEQLESIRTRCGPLSSLDMSILWITTEKGFYWNMKA EFLNFEAT  | 424 |
|                | : : : * : * : : : : * * : : . * : : : : : * *                  |     |
| H.sapiens      | TSMQYRTLLEAEMLAFHINASYPRIWNMPQTWQCELEVYKATYHFIFAQKNFFTDLIQDW   | 505 |
| D.melanogaster | TSLQYRSLAEFESLEYKVRIHYPTKWNAPQDWSISLSGCKTSAFIVYKHKCFFQDLIEDW   | 523 |
| C.elegans      | TSLIFTKLFSCKKFVNDGVSFVYPLTWNGEQTWTIDYAFTKANAWFVWDHKRLFTDLINDW  | 484 |
|                | ** : : . * . : : . * * * * . * : : : * : * * * : *             |     |
| H.sapiens      | SSDSPDIFSFVPTYTNFKI-MFHQFEMIWAANQHNWIDCSTKQQENVYLAACGETLNID    | 564 |
| D.melanogaster | ANKARPDILSFVPTYCNFSI-RLHEFEILMLCNEYNWIDCSSANQENHLAFCGDVFEMS    | 582 |
| C.elegans      | IGDDPSDISKFVPPFRVHNRMKVVDGFEVIMLLNESNVWDTADMNAENVEVAIVGEKLSFE  | 544 |
|                | .. ** .* : : : . * * : : * : * * : : * * : * * : : . . .       |     |
| H.sapiens      | FSLPFTDFVPATCNTKFSLRGEDVD-LHLFLPDCHPSKYSLFMLVKNCHPNKMIHDTGIP   | 623 |
| D.melanogaster | FALPFDDFLPKTIVTLKFWIHGEGL-LSLYVPEVSSVRPIVLAI DENAR---LLTREG--  | 636 |
| C.elegans      | CELPFVDFLPQTQMVKYEMRGEKSVAMRAKFPD SATAPIRAALSRLAR-----         | 593 |
|                | ** * : * * : : * * : : * : : : . * : : . . :                   |     |
| H.sapiens      | AECQSGQKTVKPKWRNVTQEKSGWVECWTVPSVMLTIDYTWHP IYPOKADEQLKQSLSEM  | 683 |
| D.melanogaster | -KLIRPELYSKKWRKICQRSAGWIDCWAVPILALS IQVYHPVPLGPDQPADIT TPEK    | 695 |
| C.elegans      | --CNSY--APPSKHGTHSLD TDVWFELWRTELVKMDFDHHYRPLIVKSNIPS-D-----   | 642 |

```

* . . * . : : : : : : . .
H.sapiens EETMLSVLRPSQKTS DRVVSS-PSTSSRPPIDPSELPPDKLHVEMELSPDSQITLYGPLL 742
D.melanogaster EEILLSPMRI PKVRKSPVSSWQQPPEQYSKFDPGTLAADHVTVELEIGS-SVLMAYGNVL 754
C.elegans -----IPFSILSDYLPPP-----ANHPWDLEPDYLGVDILIEG-SDVKFTGLLV 685
. : . . * * * : * : * : :

H.sapiens NAFLCIKENYFGEDDMYMDFEVVISSP---VLSLSTSSSSGWTA-----VGMENDKKEN 793
D.melanogaster RNFISLKENIFGEDQNFTDMEQSNVNMKEPGVAQVNP-KQLLAKEKELANKSISSETQPP 813
C.elegans KLLFELKNNYFGWYDSMTSVDDEKIDD--PI-KLK-----ASFD-KTN 724
. : : * : * * : . : : . : :

H.sapiens EGSAKSIHPLALRPWDITVLVNLVKVHGRLPV----HGTTDGPPECPTAFLERLCFEMKK 848
D.melanogaster EEKRKPFDPRLYRPLEVMVSVIVHDIQAHVMK----NCNEDDPPCPVVLIERFGFEMNK 868
C.elegans ANGMPV--EYFRTMNVDTVTRVCNVRAEMLLYSPAIDEGAEPEKVPVVFVEEVAVEVKK 782
* . * : : * * : : : : . : * . : : * . : : * : :

H.sapiens GFRETMLQLILSPLNVFVSDNYQQRPPVDEVLRREGHINLSGLQLRAHAMFSAEGLPLGSD 908
D.melanogaster KYHETTLQVLVSPSYLLTSDCL-QRSQREQHINQGHMLMSAVQVRGHAMFSNEGCALDED 927
C.elegans TKTQALIQVGVSPACAYLDKSS-----QGSGPCITLSGFQFRGHAMYSAKEVAVNMGM 835
: : * : * * . . : * : * . * . * . * : : . .

H.sapiens SLEYAWLIDVQAGSLTAKVTAPQLACLEW-GQTFVHVVCREYELERPKSVIICQHGID 967
D.melanogaster TLEYSWLVEVQLGKLTGKLTLPQLVNVVTG-LETLILLAIDPENCLKSPKTVRNCHHGVP 986
C.elegans LVEYGWIMEILVGDIAGTLDFAHAHVLHQIMESLLMFVISPDATKVPDRMQFCQHGQL 895
* . * : : * . : : : : : : : * . : * : *

H.sapiens RRFCE---SKLSCIPGPCPTSDDLKYTMIRLAVDGDADIYIVEHGCATNIKMGAIRVANCN 1024
D.melanogaster SNLCP---QTKEEKYKCPSSEDIKYMTRVSDAVDVYLIESGTALHAWISPIRLANCN 1043
C.elegans IKACSIAGKKTNEILGPKCTEEQMKYRQIRISVDSVNLTFVEEKTIQISADPVRVTICN 955
. * . . . * : : : * * * : : * : : . : * : *

H.sapiens LHNQSVGEGISAAIQDFQVRQYIEQLNNCRI----- 1055
D.melanogaster LHGQRVKSGISGLLPSILLRFLMLHTTNTSTFNTNTTGSNRSGKLRRADQDSLKSQDAGGS 1103
C.elegans AHESRFTEHVCIRVPGISIRQAVRIK----- 981
* . . . : . : * :

H.sapiens -----GLQPAVLRRAYWLEAGSANLGL 1077
D.melanogaster HYASHGKTGKRSSNSFSRRDSREEATRKLKRGFSETHTKRTPETEITENWVEVGCTSLGP 1163
C.elegans -----EKPENIWIEGANAAIEG 998
* : * . : :

H.sapiens ITVDI--ALAADHH---SKHEAQRHFLETHDARTKRLWFLWPDDI--LKNKRCRNKCGCL 1130
D.melanogaster ILLEGASALPIPDH---ELHLVQHNFLEHDAKFKRLWFLWSNNGSALSSEISRCGCI 1220
C.elegans VSLDI--ELPTPKSASPTIGKERLEFVRMHDADTKRLHFLWADHS-----VWGCACF 1048
: : * . : * . * * * * * : . * :

H.sapiens GGCRFFGGTGTGL-DFFKLEELTPSSSS---AFSSTSAESDMYYGQSLLPGEWIITKEI 1186
D.melanogaster GGCAFFGSNRNGQ-KFFKPTAQDAHDNYNIARYFIINNNKDFGFGESILHQQLVFHTPP 1279
C.elegans GNTCFFGDVDEIGSTFMETLT-----KKKFFVPGIERNPEKQPQVM-QSVILKNKPI 1099
* . * * . * : : : . : : . : .

H.sapiens PKII-----DGNVNGMKRKEWENKSVGIEVERKTQHLSLQV--PLRSHSSSSS----SE 1234
D.melanogaster YSLHCVSLYDTADFNGKGRLYRPAGDLRNGSLKKTDLCSLPDGTKFKIGASGTTGVEKPE 1339
C.elegans LS----- 1101
.

H.sapiens EN----SSSSAAQP--LLAGEKESPPS-----VADDHLV-----QKEFLHGTKR-D--- 1273
D.melanogaster PNCRNKSRESIGSPNTLERRTKRYPCRTQTSVDVPHYARLLDPSKKLQLQHEASAGDAGS 1399
C.elegans -----NQPHMFYKPKNA-----DVV----I-----TIRKESTGDT-- 1128
* : * . * : : . *

H.sapiens -----DGQASIPTEISGNPSPVSPNTQDKSVGQSPL 1303

```



|                |                                                                |      |
|----------------|----------------------------------------------------------------|------|
| D.melanogaster | SHRRGSDSNRLRVSPPKTISISDSRLTGDVLDDETEIPDEMHSAPH-----            | 1445 |
| C.elegans      | -----                                                          | 1128 |
| H.sapiens      | RSPLKRQASVCSTRLGSTKSLTAAFYGDKQPVTVGQVQFSSDVSRSDENVLDSPKQRRSFG  | 1363 |
| D.melanogaster | SHPLEFEIA-----DIALHVQQLGGDQLPREVQRTI-----                      | 1476 |
| C.elegans      | -----                                                          | 1128 |
| H.sapiens      | SFPYTPSADSNSFHQYRSMDSSMSMADSEAYFSAAEFEPISSDEGPG-----T          | 1412 |
| D.melanogaster | -----SLTSENPMSEFFSAEEDI SNVLSQRGSMKQRNSVNSGSVV                 | 1516 |
| C.elegans      | -----ESFHSARS-----QQSPGL-----                                  | 1142 |
|                | * :.*** . :..                                                  |      |
| H.sapiens      | YPGRKKKKK-----QTQQIDYSRGSIIYHSVEGPLTG-----HGESIQDSRTLP-        | 1455 |
| D.melanogaster | LSGKKRFSSDLSIGAQNDSHTLPTYRSDLEIHAPDGNKTLPKRPQSTTELADSRGSSS     | 1576 |
| C.elegans      | ----RI-----LQS                                                 | 1147 |
|                | :                                                              |      |
| H.sapiens      | FKTHPSQASFVSALGGEDDVIEHLYIVEGEKTVESEQITPQQPVMNCYQTYLTQFQVINW   | 1515 |
| D.melanogaster | GTPSLSSNSFISAMSSQEDVALV----NLHQQV-NRPIIDSPLLMA SYLNHLSQVKCFNW  | 1631 |
| C.elegans      | MEMSSSYATFVDNVRV-----ELPSAITV----P-----QFGEPGAILEW             | 1183 |
|                | * :*:. : : . : : *                                             |      |
| H.sapiens      | SVKHPTNKRTSKSSLHRPLDLDTPTSEESSSSFEQLSVPTFKVIKQG-----LTANS      | 1567 |
| D.melanogaster | NGCSFPLGP---DVFSTPLFSENE--DGGLTYIGSKMLPHFDLYSCWREIKVVPRYENAT   | 1686 |
| C.elegans      | CQAHQATRI-----INDV-----NTS                                     | 1199 |
|                | : :                                                            |      |
| H.sapiens      | LLDRGMQLSGSTSNTPYTPLEKKLA---DNTDDETLTEE-WTLDQPVSQTRTTAIVEVKG   | 1623 |
| D.melanogaster | GSNSSATFMGGPKSHPWDPSVLLKEEESDKTTNGFDDGEFMSLQAEGGAVCTSVVARLKG   | 1746 |
| C.elegans      | GVNE-VRFLSKPKKS-----QDIEYNTSRDTLGKRRLAINGVAAT                  | 1238 |
|                | : : . .. * : . :                                               |      |
| H.sapiens      | TVDIVLTPLVAEALDRYIEAMVHCASTRHPAAIVDDLHAKVLREAVQNSKTTFSENLSSK   | 1683 |
| D.melanogaster | QLNVFLTPLLLEGLQRMVEAAVPTIQSMHLLSVVNFIIHTSCI AKVNNDNILKRDQSLSYW | 1806 |
| C.elegans      | SLDLFVTPIGIEAFERLVTAASHVPAINPCILVHMICYRDCVLKKHRQPLT---ESL---   | 1292 |
|                | : : : : ** : * : : : : : : : : : : *                           |      |
| H.sapiens      | QDIRGKTEQSTIGTTNQGQAQTNLTMKQDNVTIKGLQTNVSI PKVNLCLLQASVEESPT   | 1743 |
| D.melanogaster | SQVHS-NSKRSTTERHLQGGPDSFLSDVYEEESISTKTQGLIVLPKVSITMLQSSIVEEII  | 1865 |
| C.elegans      | -----FADEDNDSEPISEVDITVDLPRVSI GLFQCGVKKNIV                    | 1329 |
|                | : . . : : : ** : : : ** : : :                                  |      |
| H.sapiens      | TA----PSRSVTHVSLVALCFDRIATQVRMNRGVVEET-----SNN AEPGRTS         | 1787 |
| D.melanogaster | SVAALDNVQDLSCVSLTTFYMEGISTKFHMGKTTASMHNVYIQQTQVSGSSNKKGGIMK    | 1925 |
| C.elegans      | KSNHTDHITANMGLL---LIDRA-----FIQSKLIPAE-----SVSQ                | 1363 |
|                | . : : : . . .                                                  |      |
| H.sapiens      | NFDRYV---HATKMQPQSSGSLRSNAGAEGKKEIAAKLNIHRVHGQLRGLDTTDI----    | 1839 |
| D.melanogaster | GTRALLAHLSSQTRPDNVQGEPI LIETSEKQLEEVVITLDIGRAHAQLRRLKTEGQSCTQ  | 1985 |
| C.elegans      | DFSADTSN-----LSSTLYQLNGSAITVQLLQLTNRDA----                     | 1396 |
|                | . .. * : ** * . .                                              |      |
| H.sapiens      | -GTCAITAIPEFKSKVLF TLEELDEFTFVDETDQQAVPDVTRIGPSQ--EKWGW-----   | 1890 |
| D.melanogaster | DSPIIVTAIPEHKS KVLFECLMPE-----STGI--ESIGY-----                 | 2019 |
| C.elegans      | -----PDFGSSGTATT PNNWEHCAISRR                                  | 1419 |
|                | . . : :                                                        |      |
| H.sapiens      | -----IMFECGLENLTIKGGQSGAVLY-----NSFGIMGKASDTERGGVLT SNN        | 1935 |
| D.melanogaster | -----IMFECGLEGVGKIVKRSHFEKS-ENSKEELAEMAGAGAGGGASAGGFNLNDL      | 2071 |
| C.elegans      | MNNLEPRVMMDFNVSDTLIILERRPIILLLPDKSTTAITPIH--SPA-----           | 1464 |
|                | :* : : . . . : : : : . .                                       |      |

|                |                                                               |                               |
|----------------|---------------------------------------------------------------|-------------------------------|
| H.sapiens      | --SSDSPTGSGYNTDVS-----DDNLPCDRTSPSSDLN-----GNS                | 1969                          |
| D.melanogaster | VGQGEAAGSGDGGATSKAEAAWRLITKKPPTPKTPKEKFQPASDSNISAETSGAEKGS    | 2131                          |
| C.elegans      | ----NAPTPT----A-----MNRTPTLT-----                             | 1479                          |
|                | :. : :                                                        | . *                           |
| H.sapiens      | VSDEQDEG-----VESDDLKKDLPLMPPPPDSCSMKLTIKE-                    | 2005                          |
| D.melanogaster | TPKPPDEDVEKGTSPANAQGTGAQKPSAGAGTNTKDNVDKVLNVKETDKTSSCVIELKA-  | 2190                          |
| C.elegans      | -----LTPSAGAGGGERAEP-----MRKXXX--MICEHYLKAD                   | 1510                          |
|                | :                                                             | :*                            |
| H.sapiens      | -----IWFSFAAPTNRVRSHT--HAFSRQLNLLSTATPAVGAWLVPIDQLKSSLNKLETEG | 2058                          |
| D.melanogaster | -----VWFNFAAPPCVPIITRKIDLTRLDWNLLSTASPAITAWMNPNSRLAMKIVSLMKAL | 2245                          |
| C.elegans      | IGSVTTALVMARQEL-----TAGDEFPIYEALAPVMVSWLSVVENFLRTVDKFIHTV     | 1563                          |
|                | : : * * :                                                     | : : . : * . : * : : . : . :   |
| H.sapiens      | TLRICAVMGCIMTEALENKSVHFPLRSK----YNRLTKVARFLQENPSCLLCNILHYYLH  | 2114                          |
| D.melanogaster | HTRQTAVAACLMAEAMDNEKIQRNPKIKKSRVANNYTLKTLQEDPSCQLCYIMQKLVL    | 2305                          |
| C.elegans      | ECWKSVMAMAKVLKALDSTDEKVVVKGKGRM--GRTRVLSA---HQASCPSCILLKTLFR  | 1619                          |
|                | . . . : : * : . . : :                                         | . . : : . : * * * : : .       |
| H.sapiens      | QANYSIIDDAT-----MSDGLPALVTLKKGLVALARQWMKFIVVTPA---FKGVSLHRP   | 2165                          |
| D.melanogaster | DEGVQRIETIF-----KQHDVPHLNLTRQGIIVLSRQWKNTLYNPIL---FEHQYKKNL   | 2356                          |
| C.elegans      | WFAYAGNAPGAINHRLDIRPEFEIEETRKTALMALLSHWQSDVGKELKLVSYEDAHRFKV  | 1679                          |
|                | .                                                             | * : : . : * : * . : : : :     |
| H.sapiens      | AQPLKQIAMDHEHEDGLGLDNGGGLQSDTSADGAEFEFDAATVSEHTMLLEGTANRPP-   | 2224                          |
| D.melanogaster | SRPINVTFSFPQNEEDAENDECEGDVEMGA-----FAGVGENPEE                 | 2396                          |
| C.elegans      | TRPDEAAIVALTK-----SKRLKR-----KMLEKKESSKKETRVVMEVKPEQPK-       | 1723                          |
|                | ::* : : :                                                     | : : : : : : : : : : *         |
| H.sapiens      | ---PGSSGPVTGAEIMRKLKSTHTSDSALKIKGIHPYHLSYTSGDTATDSPVHVGRAG    | 2281                          |
| D.melanogaster | SATYGHEGANHGTSQRS-----TSTSPNIHHPRRG                           | 2427                          |
| C.elegans      | ----AKRGRMSPAPLLKLRKK-----AGDDDFD-----                        | 1748                          |
|                | . * : : .                                                     | .                             |
| H.sapiens      | MPVKDSPRKESLLSYLTG-SFPSLHNLLEGTPQRSSAAVKSSSLTRTGNTVATDMLS-EH  | 2339                          |
| D.melanogaster | -----IQMLPIISG-QVPEFEY-----GALQEGSL-----SSTNSVN-KS            | 2460                          |
| C.elegans      | -----DDSMKFLSDVEMQEFNTLP-----LYEDYEDDEMLENLD                  | 1782                          |
|                | . : : . . . .                                                 | : : .                         |
| H.sapiens      | PLLSEPSSVSFYNWMSNAVGNRGSVLQESPVTKSGHNSLPTGVAPNLPTIPASDFNTVL   | 2399                          |
| D.melanogaster | WLGTEHKKEDLYFWMKQDQDNKKKHFTKEHEAR-----PAPPKM-----             | 2499                          |
| C.elegans      | SEPKIDDKVDLYTWMRQAQRESTL--RRRKLKLAGGAEGSVKDDL-----            | 1823                          |
|                | . . . : * * : :                                               | . : :                         |
| H.sapiens      | SSDQNTLDGTHSQHSTSQDDVAGVEEANQGFPAVQLADAQVVFVKPLLSHTGIQSQDT--- | 2456                          |
| D.melanogaster | -----TEHAGQTRSGIMQDSIKLLDAHLIFEPLLTCLGVMPQQM---               | 2538                          |
| C.elegans      | -----NLKGYINPMDIQKAYYYN                                       | 1842                          |
|                | : : . . : :                                                   |                               |
| H.sapiens      | MP-----FCYR---MYFGEHLSFSGTLDCLRADIVSDTAKERKKGKRARRQGHVNL--    | 2505                          |
| D.melanogaster | INKFSNADISSL---ENFGTNLSLIGTFDSIRVDIVVSEAGDKKNSAQK--PAKLNKKS   | 2593                          |
| C.elegans      | IYRWAQLQWTSLDGIEKDHWHLDYSVTLREVDVRRMAKSI---KNSSD-----HLRQYIT  | 1894                          |
|                | :                                                             | : * . * : : . : . : . : . : . |
| H.sapiens      | ----PLEFK-PALMLGTFSISAVV--MEKSVCTPQNSTSALSFDHLSKRYNTFHCNFTI   | 2558                          |
| D.melanogaster | GGRASIMMDTPLFLCERVGVELEVLMKSDGMVD-QARQNVIIYMSRRQLKKHTSTVINFSL | 2652                          |
| C.elegans      | PAQQKVMQVRNAVN-----GGMVWKMER-----DERRKIPLHGQWNISYSG           | 1936                          |
|                | :                                                             | : : * * . : : : . : .         |
| H.sapiens      | SCQSIQHVDMALVRLIHQFSTMIDDIKATQTDIKLSRYTAGS-----ASPT--P        | 2606                          |
| D.melanogaster | NVRFISQOVNMPLLRLLHQICNMYQNVKDAQNEFHDPQLSKKSQTKDECSLASEPTDIV   | 2712                          |

|                |                                                               |      |
|----------------|---------------------------------------------------------------|------|
| C.elegans      | NVEGIRFLIGMATVSLGKELSLVLRVAMEAKNELRMHSTAESFQ-----TPRNEVK      | 1987 |
|                | . . * .:* : * :::: : : : : : : : : : .                        |      |
| H.sapiens      | TFKTR-KHR-----DFR---S---SDF-----SRSSRGSLNGGNRVN---NAKNKRT     | 2643 |
| D.melanogaster | PFNSM-SERYNHAENYSDERY---DKFNETMPTMLARPRPGGLAPIIQLTSPNAKNRPQ   | 2768 |
| C.elegans      | VFKPVPVNPQYDLAVEWDEKVLDMTRDYEKHM-----                         | 2018 |
|                | *: .: :: ::                                                   |      |
| H.sapiens      | NNENNKKESR---NKNSLGRSERRT---SKVSRKGSKDVVDHMTIHMD-----         | 2686 |
| D.melanogaster | SF-AQQLRSTGKSVKGLGYTNLNESSSPLRDSPTMSLHEHNILKMSTESKASLNGACA    | 2827 |
| C.elegans      | ----QRMRT-----NKEDVVEKVKV-----MVNGSAM                         | 2041 |
|                | :: : : . : : : :                                              |      |
| H.sapiens      | -----SDSITVSEQSEPSAECWQNMKLLN-----FYSLISDPTGILEKS             | 2726 |
| D.melanogaster | TSVSGDYQNTLTAKGMPTMAPMLETPNCWKTIYHLL-----LYGTMPETKTVVQRS      | 2879 |
| C.elegans      | V-----S--SIVLESVLNDLYSVTISQIVLAHSKNPMPDIPVVVHAV               | 2082 |
|                | . : :* : . : : : .:                                           |      |
| H.sapiens      | SETFGPAGVRSPTPTCKVVFENEQDN--S---SLTKTQRKRSLVTSEPQHVTLIVFGIG   | 2781 |
| D.melanogaster | SLNEHKS-----SAGFAHDDDDLASAPTPLPQHREMLLDVASSQERTRLIVFGVA       | 2930 |
| C.elegans      | TLSTTPTA-----AA---AEDKKA---TLTKK---SV-----SSTFKID             | 2113 |
|                | : . : . : : : * : : : . * :                                   |      |
| H.sapiens      | MVNRTHLEADIGGLTMESELKRIHGSFTLKEKMKDVLHQMTETCATAHIGGVNIVLLEG   | 2841 |
| D.melanogaster | KIHKTRLLATLSGLKLESEITTLNSTATWRKKARVPS---LECSLTGQVGRAMIVLLEG   | 2986 |
| C.elegans      | D-----LTVSLTKMKL--T-----LSEADSSNKKSDILRCTLNSSSFFNVHT-----     | 2152 |
|                | * . : :: : : : . . .                                          |      |
| H.sapiens      | ITPNIQLEDFPTSPTSTAKQEFLLTVVKCSIAKSQALYSAQR-GLKTNNAAVFKVGAISIN | 2900 |
| D.melanogaster | VAPSQQ-----TVVKVTVGKSQTLYSSLKRGKDKNSGLLSIGAVNID               | 3029 |
| C.elegans      | -----NLKT-----LTSAKESNRPKNNL-----INSNIATTATLRLGALEGT          | 2189 |
|                | : * . * : . : * : . . . : * * . .                             |      |
| H.sapiens      | IPQHPATLHSMVRSSHQLSKQISDLIRQPSTAPQPVKED----IATPLPS-----       | 2947 |
| D.melanogaster | IPQHPVALHGMTRSSKQLSSTLQELRVKRNSSGRSTMRSHTAEEPESPFHARNSVGS     | 3089 |
| C.elegans      | MPMAAYSLHDVVMRHGKELEQQLNRLAAQPASTPLSS-----STPFPSAEQSLAKV      | 2241 |
|                | : * : * * . : * . : * . . . * : : : * : :                     |      |
| H.sapiens      | -----EKTPTS-----VNQTPVE----TNEFPQL-----PEGLEKKPIVLKFSAML      | 2986 |
| D.melanogaster | TGVASEMRERTVSGGAGAQQPQAARRAAHMAQSKTGTAQHQNGLLQPLVMQFNVLLQS    | 3149 |
| C.elegans      | ADMKTAPEPVVIT---QAEFKPLTTLPATAAHVQDAKG---QIVRRVPVAVVSFSIELTS  | 2295 |
|                | . : * : * * : * . . . * .                                     |      |
| H.sapiens      | IAIGAALLPSLKAEYKMRMRSHGMTGAQTRFTFELPNHRLRFTSKVSATDMSTIPPSAS   | 3046 |
| D.melanogaster | LSINAALLPSLQAQYRMNHVSSMGVTGQRAKFVIDLPTHTLSFNTKIQN--EMNLPSEAC  | 3207 |
| C.elegans      | IEMNIQLLPSLQAKYRINRATSNGITGVQANWSILLDEHFFEFVCVTGQGGKT----ETFR | 2351 |
|                | : . . * * * * : * : : : * * * : * . .                         |      |
| H.sapiens      | LNLPVMTSGKYIMEEHDSYSDQVWSIDELPSKQGYLQGNLYRCVAEVGSFEHNLTTDL    | 3106 |
| D.melanogaster | IGLPPVHVLAEYIPDHRQDHTENVEG-----IVLRQGGYVNASAEIGEFERCLTTDL     | 3259 |
| C.elegans      | LQLPSVTS DGLYQAEQGV-----SSQKPSTDKKLIYREGGSLQMTVVLRVNHIFTTEL   | 2405 |
|                | : * * * . * : . . . : * . . . : * : : * * * :                 |      |
| H.sapiens      | LNHLVVFQKVFVMKEVNEVIQKVS GGEQPIPLWNEHDGTADGD-----             | 3148 |
| D.melanogaster | LNHLVVFQKVFVMREINEVLQKVYGGKEKPVPLWTEESGDSSGA-----             | 3301 |
| C.elegans      | LNQLMFAEHSFRTELTALINRIRSSSFASSTNSRQAQSTNDRVNSTANLKL LLPVQTTST | 2465 |
|                | ** : * : * : * * : : : : . . . . .                            |      |
| H.sapiens      | ----KPKILLYSLNLQF-----KG                                      | 3163 |
| D.melanogaster | VQESSLKRILFSINISM-----KR                                      | 3320 |
| C.elegans      | PVHIEKPLLFSIKIQTKIIPRKDEKTDKDAKTPKASGASGNLDQSQHPHSHSTHVKSTPW  | 2525 |
|                | . : * : * : : .                                               |      |

H.sapiens IQVTATTSPMRRAVRFETGLIELELSNRLQTKASPGSSSYLKLFGKQCVDLNLALGQIVKH 3223  
D.melanogaster IQLTATTPCSSAVRFETGILELQLSNRVKNL---GDMSNRKLFKAHIDFNLSLQGIIRN 3377  
C.elegans LQLTAATPTQTAVRLTVDSLEGELTNKWVVK---EEGSKERIYGNNAVIHFNAKLGQLIKP 2582  
:\*\*\*:\*\* \*:\* . . :\* :\*\*\*: . \* ::: . . ::\* \*\*\*:::

H.sapiens QVYEE-----AGSDFHQVAYFKTRIGLRNALREEISGSSDREAVLITLNRPIVYAQPVAF 3278  
D.melanogaster VIFDE-----AEPEFQQYAFFHTTINLRNAFQDELLN-EDKELILLTLKRPLVYVQPIAV 3431  
C.elegans VPTGDSVAATDVTDLQEFATFMTQVRVENKERNMFNS---SYSYHISLNRPIFLVKAAGAI 2639  
: : ::: \* \* \* : :.\* :: : . :::\*\*\*:.. : . \* .

H.sapiens DRAVLFWLNYKAAAYDNWNEQRMALHKDIHM-----ATKEVVDMLPGIQQ 3322  
D.melanogaster DKAILVWLNYKNAYEYWAEKRANLCHEHAQHSLLSQYSQGHQONQNMQNQVQVDR-VAFGQ 3490  
C.elegans DKAILLWLNYKNTYDYWRNEREKVVQEKTTTKLSN-----AGMFSF-----TQ 2682  
\*:\*:\*.\*\*\*\*\*\* :\*: \* ::\* : : : . . \*

H.sapiens TSAQAFGTLFLQ-LTVNDLGIPLPITNTAQ----SNHTGDLDTGSALVLTIESTLITACS 3377  
D.melanogaster IAGSNLSTLFLQ-LTVEDMGICLPLKQVNTTTTFGSRSYQDFDAKAVVITLENTIISACN 3549  
C.elegans IAEDA--DMNLSLAINGMYMCMPLYSHDV-----TEGMPALVLSLQKSNLSVLV 2730  
: . : \* . ::: :\*\*\*: . : : \* :\*\*\*: : : : : .

H.sapiens SESLVSKGHFKNFCIRFADGFETSWDDWK-PEIHGDLVMNACVVPDGTYEVCSSRTTQAA 3436  
D.melanogaster SGALVSKGKFQGLCLRFAADFETNLDDWK-PNSA-EPIMNVCVVSEGTFEVCSSRTTAAK- 3606  
C.elegans KKELTCKASFNGFKCSFVDDFDEQALTQSFLDATHSDQSNCFIFPEGTYQLCSKAEATK- 2789  
. \*..\* .\*:: \*..\* : . : . \* .. :\*\*\*:\*\*\*: .

H.sapiens AESSAGTWTLNVLWKMCGIDVHMDPNIGKRLNALGNTLTTTLTGEEDIDDIADLNSVNIA 3496  
D.melanogaster --KGENAKWLLNVKQMEGVDIHLDVNIQKQLSSLGHTLMTLTGFEEDETQMESPDSD 3664  
C.elegans ----GPAKWVLSVAEMQGVEIDLDTRIGKLAKLLVNTFSMIRTDDEDDMSFWG---DEG 2842  
..\* \*.\* :\* \*:::..\* .\*\*\* . \* :\*\*\*: : : : : : .

H.sapiens DLSDE-DEVDTMSPTIHTTEATDYRRQAASASQPGELRGRKIMKRIVDIRELNEQAKVIDD 3555  
D.melanogaster DQSCR-----DTFVRRRGDFDNLPAFVFDPTI---DSKKRSFMMEKEMAEQLKIIND 3713  
C.elegans ELDSDEEKVE-----GASELKKL-----KAEKVPWMENKMHEHSRAVFE 2882  
: . : . : : \* : : : :

H.sapiens LKKLGASEGTINQEIQRVYQQLSVAVNDIRRDVRKLRSSMRAASLKDKWGLSYKPSYS 3615  
D.melanogaster LRTLGAHNVAHEERLQELQAICYKYFRDMIQKWKRPPLRRSLKT-----YG 3763  
C.elegans LAARGVSNKLIIEAKHKLRQYELIRFKAFRNVVEKLLKGGTTASRQHTE----- 2931  
\* \*..\* : \* : : : : : : :\*\*\*: :\* : : : .

H.sapiens RSKSISASGRPLKRMERASSRVGETEELPEIRVDAASPGPRVTFNIQDTFPEETELDLL 3675  
D.melanogaster RSHSYIGSGSS-----VSGVGVQTLDNV----SYTGRRL-----DTIASNDEISSL 3806  
C.elegans -----TP-----PPQPRP-----DT----- 2941  
\* \*\*

H.sapiens SVTIEGPSHYSSNSEGSCSVFS---SPKTPGGFSP-GI----PFQTEEGRDDSLSTSE 3727  
D.melanogaster Q---STP-----ASCHSRASLKHHTGGGVIGGGVNALGRVTFTEAMRQTSLPNADT 3855  
C.elegans -----TSRRNSRTTS--- 2951  
. \* : .

H.sapiens DSEKDEKDEDHERERFYIYRKSHTSRKKATGFAAVHQLFTEWPTTPVNRSLSGTATER 3787  
D.melanogaster DTETADNELD-----WRGDITPSEIDVDGTSV-----EMRRKHGHGQKQPEP 3897  
C.elegans --TSQKNS-----EDLTTTPGDIE 2967  
. : . .

H.sapiens NIDFELDIRVEIDSGKCVLHPTTLQEHDDISLRRSYDRSSRSLDQDSDS-----KKK 3840  
D.melanogaster NIDFELDIKVLVNSGKCVLHTKDTGEER-----GYAGGSGAATSGVPASSVKSHKREK 3950  
C.elegans TVNFNLDVKVNITSQKKEGAN-QL-----ALPGIL-----KRL 3006  
.:\*\*\*:\*\*\*:\* : \*\*.\*.\*: . \* . :.

H.sapiens KFQTNYASTTHLMT-GKKVPSSLQTKPSDLETTVFYIPGVDVKLHYNSKTLKTESPN--- 3896  
D.melanogaster SIGNDWGSPTPSRRQRDKSKLRYNANALLADLTI FHI PGLDVKLVYQSKTLAEQLTG--- 4007  
C.elegans NLG-----TKDIKAMFEPQII TTTTFSIPSVEIKAYHVS DPNRSTDEFCK 3052

```

..: . : * * **.....* :: * .
H.sapiens -----ASRGSSLPRTLKESKLYGMKD-SATSPSPPLPSTVQSKTNTLLPPQPP 3945
D.melanogaster -----DQL----- 4010
C.elegans DKREKISKGLAKDADKLRDLHNKSRFGNTYINGGGGP-----KTST-V----- 3095
..*
H.sapiens PIPAAKGGKSGGVKTAKLYAWVALQSLPEEMVISPCLLDFLEKALETIPITPVERNYTAV 4005
D.melanogaster --PT---GRRMGSKRATLCAWMTLQSIPEETIISPFILEFLEQTLEPIPARQSSSVPP-- 4063
C.elegans -----PPPPKRGCFYIFVGLASMPSETVVTPHLLATYFEQVLEPLPPSAVFQSQNN- 3145
* . : :: * **:*.* ::*: : ::*:*.* :*
H.sapiens SSQDEDMGHFEIPDPMEE-STTSLVSSSTSAYSSFPVDVVVYVRVQPSQIKFSCLP---- 4060
D.melanogaster -----TPSHNTG-VNLDILPANYVITYASFPVDVIVYFHMQPSTFRFSCLP---- 4107
C.elegans -----TREASVPDDGKGDANNEVHNIMAMDTAAFPIDFVYFLDVQSSSTIRFDGKQPTSR 3199
*. . . : ::**:*.*.* :* * :*.
H.sapiens -VSRVECMLKLPDLVDFSSNRGELETLGTTYPAETLSPGGNATQSGTKTSASKTGIPGS 4119
D.melanogaster -VSRVECMLQLPSLDIVFSSKRSSEEENS-----AQPGGHTQ----- 4143
C.elegans SQTQADCLLTLPRLTLELTSKRTRDNID----- 3227
:::*** ** * : ::**:* :
H.sapiens SGLGSPLGRSRHSSSQSDLTSSSSSSSGLSFTACMSDFSLYVFHPYGAGKQKTAVSGLTP 4179
D.melanogaster -----PDQQLPTGGLSVTGCLADFNVIIFHPYGGKKSKE----- 4178
C.elegans -----NYVGGIHIISGQFKGFMLKIYNPLELEPDS----- 3256
.*: . . : .* : ::**
H.sapiens GSGGLGNVDEEPTSVTGRKDSLSINLEFVKVLSLRIRRS GGASFFESQSVSKSASKMDTT 4239
D.melanogaster -----TQFSPLSDSERKDSLSINVEFVKFHITRCRKV----YIEPLPSSKRSLDQSRA 4227
C.elegans -----SRALQLSLDLLSFVISRKNKS-----STEPDN 3283
. : * . . . . . . . : * : .
H.sapiens LINISAVCDIGSASFKYDMRRLSEILAFPPAWYRRSIARRLFLGDQTINLPTSG---PG- 4295
D.melanogaster VIRFSTIVDIGSASFKYDMRRLTEILAFPKAWYRRRIVRRLFLGDLSVQQQQQQQQGNGA 4287
C.elegans RVRVFVSSQISKASFYFNFRRLGELIQFPPKPYRAAIARRVFFGDQAAPRQKDDASDITG 3343
::: :*..***:*:*:** *:: **:* ** *.***:*:** : .
H.sapiens -TPDSIEGVSQHLSPESSRKAYCKTWEQPSQSASFTHMPQSPNVFNEHMTNSTMSPGTVG 4354
D.melanogaster ETPTGCPPATPTPNEDASRAK-----DNMRLDFDQGPSQ-----QQQQLGHFG 4330
C.elegans TTRS-----RLPTDPK----- 3354
* * .
H.sapiens QSLKSPASIRSRVSDSSVPRRDSLSKTST-PFNKSNKAASQQGTPWETLVVFAINLKQL 4413
D.melanogaster A-----VRH-----LKNLGKSSSAESSGTPPSEKNQITAWETLVI FAVNFTKL 4373
C.elegans -SLQPP-----AASTASTGSGSFVPHQRKPWTALVLAAIQWNEF 3392
::: . : :* . * **:* **:* :
H.sapiens NVQMNSNVMGNTTWTTSGLKSGRLSVGSNRDREISMSVGLGRSQLDSKGGVVGGTIDV 4473
D.melanogaster NVQMNI GNVCNVVWLT KDFQSDGRLSIGSTGYKNMYAGIYLGGALDAKGGIVGGSFEV 4433
C.elegans EVTAFMSNTMGKTTWKATKGLVWGDAKLNSLNERDVSISFVLGSSEL CARDGAISGTIML 3452
:* :.* * : . . * . . . * : : . . ** * * : . * : * : :
H.sapiens NALEMVAHI--SEHPNQPPSHKIQITMGSTEARVDYMGSSILMGIFSNADLKLQDEWKVN 4531
D.melanogaster NKINKRFHI--KEEAGMEPYHTMGLSFMALRLDYMGTSLMTRISSFSAAMKDEWRTA 4491
C.elegans NNLKVSADHLSADVKRVPVVKAKIRLEWITANIEWMSRRVLI AKWCGPSFKVNDYYKGL 3512
* :: . . * . . : : . : * . * : * : .
H.sapiens LYNTLD---SSITDKSEIFVHGDLKWDIFQVMISRSTTPDLIKIGMKLQEFFTQQFDTSK 4588
D.melanogaster SQAAATPAHGKDQPRALIFIHGDLTWDQLQIMISKSTTADLLKMYFKLEEFFTQQFKSSK 4551
C.elegans KE-----GDHFALSELGMNVQASWKDLQVVITKSTVDDVAIVNRLISFIDEQLKNSR 3565
. . : : : . * . : * : * : * : * : * : * : * : * : * : * : * : * : * :
H.sapiens RALSTWGPVYPYLPKTMTSN-----LEKSSQEQLLDAAHHRHWPGLVKV 4632

```

|                |                                                                 |      |
|----------------|-----------------------------------------------------------------|------|
| D.melanogaster | RVFSNLEPRLQDRTASIKRRQHQHKKKPANGELVAPPQIHGMIGENTDARHHRHWQKPLAQ   | 4611 |
| C.elegans      | ILLGNLASTNLKKQAO-----ALIE--SRKPTTFWEKVLDY                       | 3601 |
|                | :.. : . :.* *                                                   |      |
| H.sapiens      | VSGCHISL-FQIPLPEDGMQFGGSMHLGHNMTLACFHGPNFRSKSWALFHLEEPNIAFW     | 4691 |
| D.melanogaster | AVGLVVPS-LVTRLPRHGVLGGTVELRGQNISLACFHGINFKSKSWALFSLRSPSINFA     | 4670 |
| C.elegans      | MSEMQMNEQLMGLMEREKAVGGHIELKAGGISLVMMKG-DMNADTWAVFHLRDACILFD     | 3660 |
|                | : : : ..* .* :*. :*. :*. :*. :*. :*. :*. :*. :*. :*             |      |
| H.sapiens      | TEAQKIWEDGSSDHSTY--IVQTLDFHLGHNTMVTKPCGALESPMATITKITRRRHENPP    | 4749 |
| D.melanogaster | TEARQSE-----DEVL--VTQTLTSSLGQTTEVQQQQ---NHSMIAVSRITRN--IIFP     | 4717 |
| C.elegans      | PEARMDFLDNSSQQKIGILLKQTFCLQLGSRHGNQ TENR--ANVCRVQTRFNNSRHLQK-   | 3717 |
|                | ** : . : ** : ** : : . . : : . .                                |      |
| H.sapiens      | HGVASVKEWFNYVTA----TRNEEL-----NLLRN-VDAN-NTEN-----STTVKNSS      | 4791 |
| D.melanogaster | PQFKTLNEWFYAFA----NSEIDAVIDRFPMLECERE-IASN-SIER-----T-----RAS   | 4762 |
| C.elegans      | --AEDILEFFIGDVMKIIIGSADHSEKKLKEVEVIQSPISENENTAKSPTSTFSRFRSPG    | 3775 |
|                | : **: . : . : : . . .                                           |      |
| H.sapiens      | LLSGFRGGSSYNHETETIFALPRMQLDFKSIHVQEPQEPSLQDAS--LKPKECVSVVTEF    | 4849 |
| D.melanogaster | GSSSAAKAQEHNHNREVI FALPSLQLHFKTEHKQGPTTPEP--SE--NKPEVLCSFITEF   | 4818 |
| C.elegans      | TSKTKESGPATNHNVMELFQFPGLEAKMSSQQLNGVDDGDKYESVFQMPMDVLTTFCDF     | 3835 |
|                | . . **: :* :* :. :. : . : *                                     |      |
| H.sapiens      | TDHICVTM-DAELIMFLHDLVSAYLKEKEKAIFFPRILSTRP-----                 | 4890 |
| D.melanogaster | DDHIFVTV-DADAFFFLHDLITSYVTEKEKVIQAQSARAASPNLSQKANLKPYLTDILK     | 4877 |
| C.elegans      | FSEVAIETNFNAQVSFLPELLKSYLKESHSGTSSSHS-----                      | 3872 |
|                | . . : . ** :* :* :* :* :* . . .                                 |      |
| H.sapiens      | ---GQKSPIII-----                                                | 4898 |
| D.melanogaster | EKKGASNTNLTAQ GKQTS GSKNSLDPLQGSHTSLANAAANMSG AATTNTTTTTTATTLSP | 4937 |
| C.elegans      | -----                                                           | 3872 |
| H.sapiens      | -----HDDNSSD-K-----DREDSITYTTVDWRDFMCNTWHLEPTLR LISWTG          | 4940 |
| D.melanogaster | GAAAGGPSTSATNDSVDGKQQQEGSPPTFDLESFVRDWRHFECQ TWLEPTVRLLSWAG     | 4997 |
| C.elegans      | -----TNSSP-----AVSSSKESVSVSETSKDPRIFTCQEWKVEPRVRFIDRI-          | 3914 |
|                | :* : * * * * : * : * * : * : *                                  |      |
| H.sapiens      | RKIDPVGVYIILQKLGFFHARTTIPKWLQRGVMDPLDKVLSVLIKKLG TALQDEKEKK--   | 4998 |
| D.melanogaster | KSIEPYGVYIILNKLGFSHARTTIPKWLQRGFM DPLDKVQALMMLQLLLMVRENKVERDS   | 5057 |
| C.elegans      | -KWTPPVLDDILKKLQIFDHRNTIPKVIQRAVLDPLDATLAASVIATLQIVDNKKT IQKF   | 3973 |
|                | . * :* **: ** : . *. ***** :* . . : * * : * : *                 |      |
| H.sapiens      | ---GKDKEEH-----                                                 | 5005 |
| D.melanogaster | GASGSGKQQQ----QNH RPPTN-----                                    | 5075 |
| C.elegans      | KKSRTDSM APTPKRRDRSRSSSEVSVSIDIPDIITDISDASFRPKHN                | 4020 |
|                | . . .                                                           |      |

**B**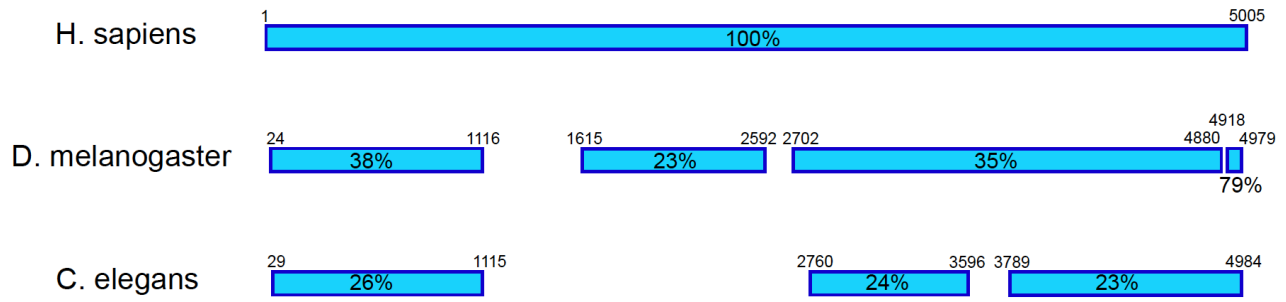

**Figure S8: KIAA1109 protein conservation**

**(A)** Multi-alignments of *Homo sapiens* KIAA1109, *Caenorhabditis elegans* lpd-3 and *Drosophila melanogaster* tweek proteins obtained using Clustal Omega (v1.2.3).

**(B)** Schematic representation of aligned segments of KIAA1109 proteins obtained using BLASTP tool on Ensembl. *Homo sapiens* protein sequence was used as query and *D. melanogaster* and *C. elegans* as subjects. Percentage of identity between the *H. sapiens* sequence and the subjects are indicated. The numbering pinpoints the coordinate of the human residues at the beginning and end of human regions with similarities. *H. sapiens* NM\_015312, *D. melanogaster* NM\_001201898 and *C. elegans* NM\_001313537.



**Table S1: Predicted pathogenicity and allele frequencies of the variants identified in *KIAA1109* gene**

| Family | Inheritance           | Mutation coordinates (GRCh37/hg19)                    | Amino Acid change  | dbSNP v147  | Allele frequency (ExAC v0.3.1) | PolyPhen2 prediction (score) | PROVEAN prediction (score) | SIFT prediction (score) |
|--------|-----------------------|-------------------------------------------------------|--------------------|-------------|--------------------------------|------------------------------|----------------------------|-------------------------|
| LT     | Compound heterozygous | Chr4:123160823; c.3986A>C                             | Tyr1329Cys         | rs770791100 | 0.000041                       | Probably damaging (0.993)    | Deleterious (-2.52)        | Damaging (0.001)        |
|        |                       | Chr4:123170727; c.5599G>A                             | Val1867Met         | -           | -                              | Probably damaging (0.969)    | Neutral (-0.45)            | Damaging (0.024)        |
| UK     | Compound heterozygous | Chr4:123164200; c.4719G>A                             | Met1573Ile         | rs368227278 | 0.000008                       | Benign (0.000)               | Neutral (-0.64)            | Tolerated (0.835)       |
|        |                       | Chr4:123171679; c.5873G>A                             | Arg1958Gln         | -           | -                              | Benign (0.001)               | Neutral (-0.44)            | Tolerated (0.594)       |
| AL     | Homozygous recessive  | Chr4:123207807; c.9149C>A                             | Pro3050His         | -           | -                              | Probably damaging (1.000)    | Deleterious (-7.36)        | Damaging (0.000)        |
| TU1    | Homozygous recessive  | Chr4:123230520; c.10153G>C                            | Gly3385Arg         | -           | -                              | Probably damaging (1.000)    | Deleterious (-6.17)        | Damaging (0.001)        |
| TU2    | Homozygous recessive  | Chr4:123230520; c.10153G>C                            | Gly3385Arg         | -           | -                              | Probably damaging (1.000)    | Deleterious (-6.17)        | Damaging (0.001)        |
| SA1    | Homozygous recessive  | Chr4:123128323; c.1557T>A                             | Tyr519Ter          | rs730882245 | -                              | -                            | -                          | -                       |
| SA2    | Homozygous recessive  | Chr4:123252480; c.11250-1G>A                          | His3751_Arg3822del | -           | -                              | -                            | -                          | -                       |
| SA3    | Homozygous recessive  | Chr4:123258092; c.12067G>T                            | Glu4023Ter         | -           | -                              | -                            | -                          | -                       |
| US     | Compound heterozygous | Chr4:123254885_123263438delinsG; c.11567_12352delinsG | Lys3856Argfs*44    | -           | -                              | -                            | -                          | -                       |
|        |                       | Chr4:123113479; c.997dupA                             | Ile333Asnfs*5      | -           | -                              | -                            | -                          | -                       |
| SG     | Compound heterozygous | Chr4:123147970; c.2902C>T                             | Arg968Cys          | -           | -                              | Probably damaging (0.966)    | Deleterious (-2.53)        | Tolerated (0.058)       |
|        |                       | Chr4:123159280; c.3611delA                            | Asn1204Thrfs*6     | -           | 0.000008309                    | -                            | -                          | -                       |
